# Intermittent fasting and caloric restriction interact with genetics to shape physiological health in mice

Guozhu Zhang\*, Andrew Deighan†, Anil Raj\*, Laura Robinson†, Hannah J. Donato†, Gaven Garland†, Mackenzie Leland†, Baby Martin-McNulty\*, Ganesh A. Kolumam\*, Johannes Riegler\*, Adam Freund\*, Kevin M. Wright\*,§,1, and Gary Churchill†,§,2

\* Calico Life Sciences LLC, South San Francisco, California

† The Jackson Laboratory, Bar Harbor, Maine

§ Co-senior authors

1 **Dietary interventions can dramatically affect phys-**  
2 **iological health and organismal lifespan. The de-**  
3 **gree to which organismal health is improved de-**  
4 **pends upon genotype and the severity of dietary in-**  
5 **tervention, but neither the effects of these factors,**  
6 **nor their interaction, have been quantified in an out-**  
7 **bred population. Moreover, it is not well understood**  
8 **what physiological changes occur shortly after di-**  
9 **etary change and how these may affect the health**  
10 **of early adulthood population. In this article, we**  
11 **investigated the effect of six month exposure of ei-**  
12 **ther caloric restriction or intermittent fasting on a**  
13 **broad range of physiological traits in 960 one year**  
14 **old Diversity Outbred mice. We found caloric re-**  
15 **striction and intermittent fasting affected distinct**  
16 **aspects of physiology and neither the magnitude nor**  
17 **the direction (beneficial or detrimental) of effects**  
18 **were concordant with the severity of the interven-**  
19 **tion. In addition to the effects of diet, genetic vari-**  
20 **ation significantly affected 31 of 36 traits (heritabil-**  
21 **ities ranged from 0.04-0.65). We observed signifi-**  
22 **cant covariation between many traits that was due**  
23 **to both diet and genetics and quantified these ef-**  
24 **fects with phenotypic and genetic correlations. We**  
25 **genetically mapped 16 diet-independent and 2 diet-**  
26 **dependent significant quantitative trait loci, both of**  
27 **which were associated with cardiac physiology. Col-**  
28 **lectively, these results demonstrate the degree to**  
29 **which diet and genetics interact to shape the physi-**  
30 **ological health of early adult-hood mice following six**  
31 **months of dietary intervention.**

32 intermittent fasting | caloric restriction | physiological health | gene x environ-  
33 ment interaction | Diversity Outcross mice

34 Correspondence: 1 [wright@calicolabs.com](mailto:wright@calicolabs.com), 2 [gary.churchill@jax.org](mailto:gary.churchill@jax.org)

## 35 Introduction

36 Dietary modifications are the most robust inter-  
37 ventions known to increase organismal lifespan.  
38 Caloric restriction (CR) has been shown to in-  
39 crease lifespan in multiple species including yeast,  
40 worms, flies, rats, mice, and non-human pri-  
41 mates (Heilbronn and Ravussin (2003); Kaeberlein  
42 *et al.* (2005); Colman *et al.* (2009); Mattison *et al.*  
43 (2017); Liang *et al.* (2018); Pifferi *et al.* (2019)).  
44 Another dietary modification, intermittent fasting  
45 (IF), has been shown to increase lifespan in ro-  
46 dents (Goodrick *et al.* (1990)). However, the bene-  
47 ficial effects of these dietary interventions are not

48 universal and can be influenced by sex, genetic  
49 variation and adaptation to the lab environment  
50 (Goodrick *et al.* (1990); Harper *et al.* (2006); Liao  
51 *et al.* (2010); Mitchell *et al.* (2016)). Moreover, the  
52 timing and duration of dietary intervention can  
53 alter the magnitude of lifespan effects, with the  
54 greatest increase observed when CR is imposed  
55 early and maintained throughout life (Weindruch  
56 *et al.* (1982); Yu *et al.* (1985); Goodrick *et al.* (1990);  
57 Dhahbi *et al.* (2004)). However, the age-specific  
58 genetic and physiological mechanisms that deter-  
59 mine whether CR or IF will lengthen lifespan re-  
60 main largely unknown.

61 Dietary intervention is hypothesized to extend  
62 lifespan by improving the physiological function  
63 of multiple systems, including but not limited to,  
64 metabolic, neurological, and cardiovascular (Ah-  
65 met *et al.* (2011); Colman *et al.* (2009); Gredilla  
66 and Barja (2005); Redman *et al.* (2018); Gräff *et al.*  
67 (2013); Patel *et al.* (2005); Halagappa *et al.* (2007)).  
68 In some instances, changes in gene expression,  
69 metabolite levels, and physiology occur shortly af-  
70 ter the initiation of daily CR (Cao *et al.* (2001);  
71 Dhahbi *et al.* (2004); Mulligan *et al.* (2008); Bruss  
72 *et al.* (2010)). Despite the large number of CR ex-  
73 periments, it is not well understood how diet and  
74 genetics shape early-life changes in physiological  
75 traits and whether these changes may have last-  
76 ing effects on lifespan.

77 In humans, the largest CR intervention trial pub-  
78 lished to date found that a two-year 25% CR treat-  
79 ment in a population of middle-aged, non-obese  
80 individuals caused significant reductions to mul-  
81 tiple cardiovascular and metabolic syndrome risk  
82 factors (Kraus *et al.* (2019)). However, the effect  
83 of CR was not universally beneficial, participants  
84 in this trial experienced significant reductions in  
85 bone mineral density, muscle size and function  
86 (Villareal *et al.* (2006); Weiss *et al.* (2007); Villareal  
87 *et al.* (2016)). These studies demonstrate that CR  
88 improved multiple aspects of physiological func-  
89 tion while worsening others in a relatively healthy  
90 population. It remains to be determined whether  
91 this result is a generalizable feature of CR inter-  
92 ventions and whether IF treatment would produce  
93 similarly heterogeneous physiological effects. Ad-

ditionally, it is unknown how genetic variation may contribute to the variation in the physiological response to dietary intervention. We investigate the effect of both CR and IF on a range of physiological traits using Diversity Outbred (DO) mice (*Mus musculus*), a multi-parent genetic mapping population founded from eight inbred strains (Svenson *et al.* (2012); Churchill *et al.* (2012)). Our goal is to identify how dietary interventions affect different aspects of physiology in early adulthood mice. We measure the effect of CR and IF on 36 morphological and functional traits derived from six phenotypic assays: grip strength, rotarod, dual-energy X-ray absorptiometry (DEXA), echocardiogram, acoustic startle, and wheel running. Many traits change significantly in one year old mice exposed to dietary intervention for six months. The correlated change in trait values enabled us to cluster traits into distinct axes of physiology and measure how they were altered in response to dietary intervention. A significant proportion of phenotypic variation in 30 traits is heritable and for many traits in the same cluster, a large proportion of the heritable variation the genetic effects are correlated. We map 24 diet-independent quantitative trait loci (QTL) and five diet-dependent QTLs. We impute all DO founder variants, fine-map QTL intervals to near single gene resolution and identify the founder allele(s) associated with trait variation. These findings enable us to conclude that dietary intervention has heterogeneous effects on physiological health in mice during early adulthood, phenotypic variation in many physiological health traits has a large genetic component, and in the case of cardiac physiology, variation is influenced by the interaction between genetics and dietary intervention.

## Study Design and Measurements

The DO mouse population was derived from eight inbred founder strains and is maintained at The Jackson Laboratory as an outbred heterozygous population (Svenson *et al.* (2012)). This study contains 960 female DO mice, sampled at generations: 22 – 24 and 26 – 28. There were two cohorts per generation for a total of 12 cohorts and 80 animals per cohort. Enrollment occurred in successive quarterly waves starting in March 2016 and continuing through November 2017. A single female mouse per litter was enrolled into the study after wean age (three weeks old), so that no mice in the study were siblings and maximum genetic diversity was achieved. Mice were housed in pressurized, individually ventilated cages at a density of eight animals per cage (cage assignments were random). Mice were subject to a 12 hr:12 hr light:dark cycle beginning at 0600 hrs.

All animal procedures were approved by the Animal Care and Use Committee at The Jackson Laboratory.

From enrollment until six months of age, all mice were on an Ad Libitum diet of standard rodent chow 5KOG from LabDiet. At six months of age, each cage of eight animals was randomly assigned to one of five dietary treatments, with each cohort equally split between the five groups (N=192/group): Ad Libitum (AL), 20% caloric restriction (20), 40% caloric restriction (40), one day per week fast, (1D) and two days per week fast (2D) (see Figure 1). In a previous internal study at The Jackson Laboratory, the average food consumption of female DO mice was estimated to be 3.43g/day. Based on this observation, mice on 20% CR diet were given 2.75g/mouse/day and those on 40% CR diet were given 2.06g/mouse/day. Food was weighed out for an entire cage of eight. Observation of the animals indicated that the distribution of food was roughly equal among all mice in a cage across diet groups.

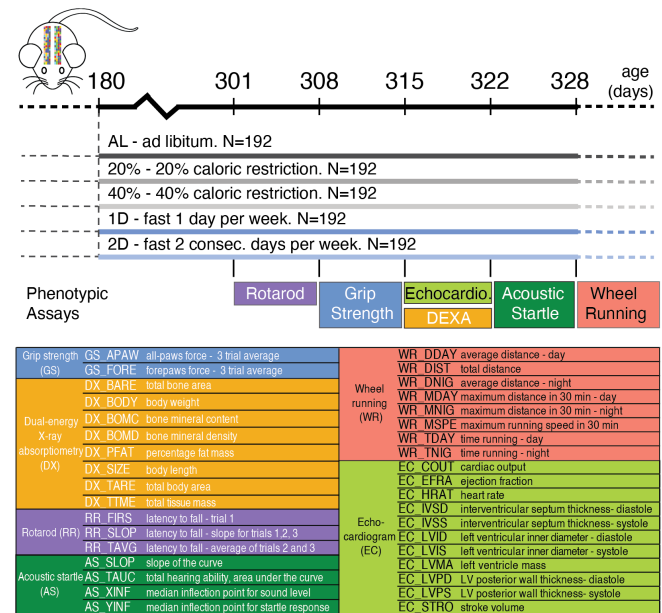

Fig. 1. Study design. Dietary intervention starts at 180 days of age. Experimental procedures take approximately one week starting from given day.

Mice on AL diet had unlimited food access; they were fed when the cage was changed once a week. In rare instances when the AL mice consumed all food before the end of the week, the food was topped off mid week. Mice on 20% and 40% CR diets were fed daily. These mice were given a triple feeding on Friday afternoon to last till Monday afternoon. As the number of these mice in each cage decreased over time, the amount of food given to each cage was adjusted to reflect the number of mice in that cage. Fasting was imposed weekly from Wednesday noon to Thursday noon for mice on 1D diet and Wednesday noon to Friday noon

1 for mice on 2D diet. Mice on 1D and 2D diets have  
2 unlimited food access (similar to AL mice) on their  
3 non-fasting days.

4 **Phenotypic Assays.** We carried out six phenotypic  
5 assays to assess motor and neuromuscular func-  
6 tion, activity, body composition, hearing and car-  
7 diovascular physiology, at approximately one year  
8 of age, five to six months following dietary inter-  
9 vention (Figure 1). All assays were conducted at  
10 The Jackson Laboratory following standard oper-  
11 ating procedures that are included in the Supple-  
12 mental Materials.

13 The rotarod assay was run with three consecu-  
14 tive trials per animal and we derived three traits  
15 to measure each animal's latency to fall (Figure  
16 1). The grip strength assay was run with three  
17 consecutive trials for all-paws and three trials for  
18 forepaws. In order to maximize the robustness of  
19 this assay, we removed any trial with log-normal  
20 Euclidean distance in the upper 5% quantile of  
21 the distribution of all animals and then calculated  
22 the per mouse average of the remaining trials. We  
23 used dual-energy X-ray absorptiometry to quan-  
24 tify eight body and bone composition traits (Fig-  
25 ure 1). We measured voluntary wheel running in  
26 30 minutes intervals for three nights and two days  
27 (mice were single housed for this assay). We used  
28 these data to derive average distance, time spent  
29 running and max speed in the following intervals:  
30 12 hour day, 12 hour night and 24 hour inter-  
31 vals (Figure 1). The echocardiogram assay mea-  
32 sured 11 traits capturing both heart morphology  
33 and function (Figure 1). Note, cardiac output is not  
34 directly measured, it is calculated from the prod-  
35 uct of stroke volume and heart rate.

36 The acoustic startle assay followed the sound-  
37 startle response protocol in which animals were  
38 exposed to five sound levels ranging from 80-120  
39 decibels(dB) at 10dB steps. Each animal's average  
40 startle response was normalized to background  
41 noise. To robustly measure hearing and sensori-  
42 motor function, we fit the startle response mea-  
43 surements for each animal to a five parameter lo-  
44 gistic model with the R package nplr (Commo and  
45 Bot (2016)) and derived four values to quantify the  
46 shape of the logistic model (description provided in  
47 Figure 1). For a few animals, we estimated the the  
48 median sound response value to be greater than  
49 120dB, the maximum sound level in our experi-  
50 ment. These values were set to 122dB, which is  
51 twice as loud as 120dB and is often used as the  
52 peak sound level in noise induced hearing loss re-  
53 search in rodent models (Kim *et al.* (2005); Escabi  
54 *et al.* (2019)).

55 **Outlier detection and batch correction.** We first iden-  
56 tified technical outliers resulting from equipment

57 failure or mislabeled animals and if we could not  
58 manually correct them using lab records, they  
59 were removed. The total number of samples per  
60 trait after outlier removal is listed in Supplemen-  
61 tal Table S1. In order to prevent potential biases in  
62 interpretation and increase the reliability of these  
63 trait measurements, we corrected values for batch  
64 and technician effects (Mandillo *et al.* (2008); Gu-  
65 linello *et al.* (2019); Kafkafi *et al.* (2018)). For this  
66 experiment, there were 12 batches (two for each  
67 DO generation) and eight technicians. To quantify  
68 batch and technician effects, we fit an Analysis of  
69 Variance (ANOVA) model as follows:

$$Trait = Diet + Batch + Experimenter + Error(1)$$

70 In contrast to all other assays, greater than 80%  
71 of echocardiogram derived traits were collected by  
72 a single technician and we determined that a re-  
73 duced ANOVA model including Batch and not Ex-  
74 perimenter terms was sufficient to control for the  
75 batch and technician effects. We used the resid-  
76 uals from each model to identify and remove bi-  
77 ologically impossible values according to Tukey's  
78 rule for far outlier (Tukey (1977)). After removing  
79 far outliers, we repeated the model fit procedure.  
80 To remove batch and experimenter effects, we ad-  
81 justed each trait using the batch and experimenter  
82 model coefficients.

83 Grip strength and rotarod derived traits can be  
84 confounded by body weight (Crawley (2007); Mau-  
85 rissen *et al.* (2003); Hood (2011)) and in order to  
86 account for this, we fit the following Analysis of  
87 Covariance (ANCOVA) model:

$$Trait = Diet + Batch + Experimenter + Weight + Error(2)$$

88 To remove body weight effect for grip strength and  
89 rotarod derived traits, we adjusted the trait value  
90 using the following formula:

$$AdjTrait = Trait - Beta * (Weight - AveWeight)(3)$$

91 where *Beta* is the body weight coefficient from the  
92 ANCOVA model and *AveWeight* is the population  
93 mean body weight. Following technical, batch,  
94 technician, and outlier correction, we applied z-  
95 score standardization for all traits. Unless other-  
96 wise stated, these values were used for each sub-  
97 sequent analysis.

98 **Phenotypic effect of dietary intervention.** In order to  
99 quantify the effect of dietary intervention on each  
100 trait, we applied an ANOVA model with Dunnett  
101 post-hoc test to compare each diet intervention  
102 group to the AL group. In order to account for  
103 statistical testing across multiple traits, we ap-  
104 plied the Westfall-Young multiple testing adjust-  
105 ment (Westfall *et al.* (1993)).

**Phenotypic correlation and unsupervised clustering analysis.** We calculated correlation coefficients within each diet treatment, and experiment-wide correlation coefficients for all animals across all diets. We performed unsupervised hierarchical clustering analysis using the distance metric  $1 - |\text{Phenotypic Correlation}|$  and complete linkage. For animals to be included in this hierarchical clustering procedure we required they had no missing trait data ( $N = 525$ ). To determine cluster membership of each trait, we applied a sensitivity analysis by first calculating the within cluster similarity, dist-within, of a trait as the average pairwise distance to all other traits in the same cluster. Second, we calculated the across cluster similarity, dist-across, as the average pairwise distance to all traits outside of the cluster. Small values of dist-within indicate the trait is highly correlated with traits within the cluster, whereas large values of dist-across indicate the trait is highly uncorrelated with traits outside of the cluster. To identify robust clusters of highly correlated traits, the hierarchical clustering algorithm minimizes the penalty score, defined as dist-within/dist-across. This penalty score is sensitive to the size of the cluster and to derive a cluster size specific penalty significance threshold, we used a bootstrap method with 1,000 resampling trials. The cluster size specific penalty significance threshold was defined as the  $0.05/(\text{cluster size}-1)$  quantile value (Supplemental Table S2).

In order to organize traits into robust clusters, we first created a dendrogram with 5 clusters and compared the observed penalty scores to the bootstrap derived penalty threshold values. Within each cluster, we removed traits that had a higher penalty score than the penalty significance threshold by moving the cut-tree function closer to the origin node of the dendrogram. After the creation of a new set of clusters, we repeated the process until every newly created cluster had a penalty score that was less than the bootstrap derived penalty threshold values. We kept singletons, as single-trait clusters. Finally, we used principle component (PC) analysis of traits within the same multi-trait cluster to derive composite traits. All PC derived traits with a cumulative of 90% total variance explained were included in genetic linkage analyses.

**Genotype data and quality assessment.** We collected tail clippings and extracted DNA using DNeasy Blood and Tissue Kit (Qiagen) from 954 animals. Samples were genotyped using the 143,259-probe GigaMUGA array from the Illumina Infinium II platform (Morgan *et al.* (2016)) by NeoGen Corp. ([genomics.neogen.com/](http://genomics.neogen.com/)). We evaluated geno-

type quality using the R package: qtl2 (Broman *et al.* (2019)). We processed all raw genotype data with a corrected physical map of the GigaMUGA array probes ([https://kbroman.org/MUGAarrays/muga\\_annotations.html](https://kbroman.org/MUGAarrays/muga_annotations.html)). After filtering genetic markers for uniquely mapped probes, genotype quality and a 20% genotype missingness threshold, our dataset contained 110,807 markers.

We next examined the genotype quality of individual animals. We found seven pairs of animals with identical genotypes which suggested that one of each pair was mislabelled. We identified and removed a single mislabelled animal per pair by referencing the genetic data against coat color. Next, we removed a single sample with missingness in excess of 20%. All remaining samples exhibited high consistency between tightly linked markers: log odds ratio error scores were less than 2.0 for all samples (Lincoln and Lander (1992)). The final set of genetic data consisted of 946 mice.

For each DO mouse, we compared its genotype to that of the eight founder strains at all 110,807 markers to calculate the probability that a given founder contributed a given allele at that marker (implemented in the R package: qtl2 Broman *et al.* (2019)). In other words, the founder-of-origin probability is the likelihood a given DO mouse possess a specific founder haplotype at the focal marker and can be used to identify genomic regions that are identical-by-descent. This allowed us to directly test for an association between the founder-of-origin probability and phenotype at all genotyped markers. Using the founder-of-origin of consecutive typed markers and the genotypes of untyped variants (SNPs and small insertion-deletions) in the founder strains, we then imputed the genotypes of all untyped variants (34.5 million) in all 946 mice. The majority, but not all, of imputed variants were bi-allelic SNPs. Targeted association testing at imputed variants allowed us to fine-map many QTLs to near single gene resolution.

**Genetic Linkage Analysis.** With the R qtl2 package, we calculated kinship matrices using the leave-one-chromosome-out (LOCO) method and conducted quantitative trait locus mapping analyses (Broman *et al.* (2019)). In order to identify significant additive genetic associations, we fit a linear mixed model with diet and founder-of-origin probabilities per marker as fixed effects and kinship as a random effect. To identify significant genotype by diet (GxD) interaction effects, we fit a linear mixed model with diet and founder-of-origin probabilities and their interactions as fixed effects and kinship as a random effect. To calculate an LOD score for

1 the GxD interaction term we subtracted the LOD  
2 score of the full model from the additive model.  
3 To determine whether the interaction LOD score  
4 was statistically significant, we conducted a per-  
5 mutation analysis by randomizing phenotype val-  
6 ues (regardless of dietary treatment), fitting both  
7 the full and the additive models, subtracting the  
8 genome wide set of LOD scores of the full model  
9 from the additive model and storing the maximum  
10 LOD value (Churchill and Doerge (1994)). We re-  
11 peated this procedure 1,000 times to obtain a dis-  
12 tribution of maximum LOD scores and applied em-  
13 pirical p-value threshold of 0.05 to define signifi-  
14 cant QTLs and 0.1 as suggestive QTLs.

15 For each significant and suggestive QTL, we im-  
16 puted variants for 5Mb +/- the lead marker posi-  
17 tion and re-ran the QTL mapping procedure (im-  
18 plemented in the snpscan function from qtl2). To  
19 assess the significance of imputed variants for  
20 each region, we re-ran the permutation proce-  
21 dures as previously described with 1,000 itera-  
22 tions and applied empirical p-value threshold of  
23 0.05. Finally, we identified all candidate variants  
24 as those that are specific to lead founder-allele-  
25 pattern (FAP), or if the lead FAP contains fewer  
26 than 10 variants, we also include variants spe-  
27 cific to the second ranked FAP. We identified lead  
28 candidate genes by their proximity to candidate  
29 FAP variants and by cross-referencing against phe-  
30 notypic effect in the Mouse Genome Informatics  
31 (www.informatics.jax.org) database.

32 **Heritability and Genetic Correlations Analyses.** For  
33 each trait, we calculated the additive genetic vari-  
34 ance relative to phenotypic variance, e.g. narrow-  
35 sense heritability, and its 95% credible interval us-  
36 ing a Bayesian model with diet as a fixed effect and  
37 kinship as a random effect based on the EMMA  
38 model as implemented in R's STAN package (Kang  
39 *et al.* (2008); Carpenter *et al.* (2017); Stan Devel-  
40 opment Team (2020)). We assessed whether heri-  
41 tability was significantly greater than zero by ap-  
42 plying one-sided z-test to the posterior distribution  
43 with false discovery rate controlled at 0.05.

44 To measure the degree to which the additive ge-  
45 netic variance underlying two traits is shared  
46 we calculated their genetic correlation using the  
47 mathematical framework described in Furlotte  
48 and Eskin (2015). We used a Bayesian model  
49 implemented in R's STAN package (Stan Develop-  
50 ment Team (2020)) to estimate the genetic corre-  
51 lation and its 95% credible interval. The details  
52 about model assumptions and priors are in the  
53 Supplemental Materials. We ran three independ-  
54 ent chains with 2,000 Markov chain Monte Carlo  
55 (MCMC) iterations, and posterior estimates were  
56 derived by combining all three MCMC chains af-

57 ter 1,000 burn-ins. The convergence diagnostics  
58 were assessed by Gelman-Rubin's statistic (Gel-  
59 man and Rubin (1992)). The significance of phe-  
60 notypic correlation was determined by t-test and  
61 the significance of genetic correlation was deter-  
62 mined by posterior mean and standard deviation  
63 under standard normal distribution. We applied  
64 Benjamini and Hochberg (1995) method to control  
65 significant phenotypic and genetic correlations re-  
66 spectively, at a false discovery rate of 0.05.

67 **Comparison of full and reduced genotype-by-diet as-  
68 sociation models to measure interaction effects.** In or-  
69 der to determine which diet intervention(s) are re-  
70 sponsible for genotype-by-diet interaction effects,  
71 we re-tested the lead genotyped marker at each sig-  
72 nificant QTL in the following models:

$$Null : T = D_{Full} + G + G * D_{Full} + K + e$$

$$Alternative : T = D_{Full} + G + G * D_{Reduced} + K + e$$

74 where  $T$  is trait,  $G$  is genotype,  $K$  is kinship,  $e$  is  
75 error,  $D_{Full}$  is all five treatments and  $D_{Reduced}$  elimi-  
76 nates, in singles or pairs, 1D fast, 2D fast, 20% CR,  
77 or 40% CR. We first remove a single diet at a time  
78 and evaluate the fit of each alternative model using  
79 the likelihood ratio test. The diet with the highest  
80 LOD score is then tested in pairs with each of the  
81 other three diets to determine whether model fit is  
82 improved.

## 83 Results

84 **Dietary intervention altered physiology of early adult-  
85 hood mice.** We measured the effect of dietary in-  
86 terventions on multiple aspects of mouse physiol-  
87 ogy and found that both the type (CR vs IF) and  
88 magnitude of each intervention affected the phys-  
89 iological response. To summarize, the 40% CR in-  
90 tervention had the greatest impact, 24 of 36 total  
91 traits were significantly different compared to the  
92 AL diet (Figure 2). For select traits we also pro-  
93 vide the non z-score transformed values (Supple-  
94 mental Figure S1). Following the 40% CR inter-  
95 vention, the 20% CR, 2D fast, and 1D fast treat-  
96 ments resulted in 11, 9 and 4, traits changing sig-  
97 nificantly in comparison to the AL group (Figure 2).  
98 Examining body weight, body length, percent lean  
99 mass, tissue mass, tissue area, and bone mineral  
100 content, the treatment with the largest effect in  
101 comparison to AL was 40% CR and this effect was  
102 more than double the difference between 20% CR  
103 and AL (Figure 2). Interestingly, the 2D fast and  
104 20% CR had nearly the same mean body weights,  
105 however the treatments exhibited opposite effects  
106 on body fat percentage: 2D fast reduced and 20%  
107 CR increased DX\_PFAT (Figure 2). In summary, we

1 found intermittent fasting and daily caloric restric- 58  
2 tion had distinct effects on multiple body and bone 59  
3 composition traits and changes in response to the 60  
4 40% CR and 2D fast treatments were not simply 61  
5 a doubling of magnitude of 20% CR and 1D fast 62  
6 treatment effects. These patterns were also ob-  
7 served for additional physiological traits.

8 We uncovered multiple cardiac phenotypes which 63  
9 were significantly altered by both the 20% CR 64  
10 and 40% CR treatments whereas no significant ef- 65  
11 fect was detected in the intermittent fasting treat- 66  
12 ments. Heart rate, cardiac output, and diastolic 67  
13 left ventricle wall thickness (EC\_HRAT, EC\_COUT, 68  
14 EC\_LVPD) were significantly lower in both CR 69  
15 groups compared to AL (Figure 2). Additionally, 70  
16 the 20% CR group exhibited significantly lower 71  
17 systolic left ventricle wall thickness (EC\_LVPS) and 72  
18 stroke volume (EC\_STRO) whereas the 40% CR 73  
19 group exhibited significantly lower left ventricle 74  
20 mass and inner dimension in systole and dias- 75  
21 tole (EC\_LVMA, EC\_LVIS, EC\_LVID). The cumula- 76  
22 tive effect of these divergent responses was that 77  
23 the 20% CR group had the lowest ejection frac- 78  
24 tion and the 40% CR group had the highest ejection 79  
25 fraction (Figure 2, EC\_EFRA). Similarly, after 80  
26 controlling for body weight, we found cardiac out- 81  
27 put was lowest for the 20% CR group and high- 82  
28 est for the 40% CR group (Supplemental Figure 83  
29 S1E,F). These results suggest that caloric restric- 84  
30 tion, and not intermittent fasting, was detrimental 85  
31 to the cardiovascular efficiency of early adulthood 86  
32 mice treated with 20% CR and beneficial to the 87  
33 40% CR group. This pattern of effects was similar 88  
34 to the effects on lean and fat mass, in which 89  
35 20% CR, and 40% CR treatment effects relative 90  
36 to AL varied in both magnitude and sign (positive or 91  
37 negative).

38 We conducted multiple experiments to measure 92  
39 neuromuscular and motor function: running on 93  
40 a wheel, grip strength, and balancing on the ro- 94  
41 tarod. Wheel running activity, measured as total 95  
42 distance, max speed, and amount of time on a 96  
43 running wheel, were significantly increased in the 97  
44 40% CR treatment compared to all other groups 98  
45 for both the light and dark cycles (Figure 2). The 99  
46 2D fast treatment exhibited a significant increase 100  
47 in total wheel time and moderate increases in dis- 101  
48 tance and max speed during the day compared to 102  
49 the other groups (Figure 2). No wheel running 103  
50 traits were significantly different in the 1D fast or 104  
51 20% CR treatments in comparison to the AL group 105  
52 (Figure 2). The only significant difference observed 106  
53 among the grip strength and rotarod traits was an 107  
54 increase in all-paws grip strength in the 40% CR 108  
55 and 2D fast treatments (Figure 2). To summarize 109  
56 the effect of dietary intervention on neuromuscu- 110  
57 lar and motor function, the 40% CR treatment,

followed by 2D fast, ran the farthest, and -by at 58  
least one measure- had the greatest strength. In- 59  
terestingly, these same groups had the lowest body 60  
weight, lowest body fat percentage, and highest 61  
lean mass percentage. 62

We measured hearing ability using the acoustic 63  
startle experiment. We found the AL treatment 64  
had the most sensitive hearing whereas the 40% 65  
CR treatment mice had the least sensitive hearing, 66  
when measured as the total area under the startle 67  
response curve (AS\_TAUC, Figure 2). This result 68  
suggested that 6 month exposure to 40% CR treat- 69  
ment, in contrast to all other interventions, had a 70  
detrimental effect on hearing ability in 12 month 71  
old mice. 72

Collectively, these results demonstrated that in- 73  
termittent fasting and daily caloric restriction had 74  
distinct effects on multiple aspects of physiology 75  
and neither the magnitude nor the sign of effects 76  
were linear with respect to daily calorie intake or 77  
length of intermittent fasting regime. Addition- 78  
ally, none of these interventions were universally 79  
beneficial across all aspects of organismal physi- 80  
ology. Finally, we found the effect of dietary in- 81  
tervention was correlated between many traits. In 82  
some instances, this was because one trait was 83  
directly calculated from another trait measured in 84  
the same assay (see Methods: Phenotypic Assays). 85  
Alternative and mutually non-exclusive hypothe- 86  
ses may also explain these results: 1) the traits 87  
measured similar aspects of physiology (e.g. fat 88  
mass and body weight), 2) the traits were derived 89  
from the same phenotypic assay and environmen- 90  
tal variables (e.g. time of day, time of year, ex- 91  
perimenter) were constant, and 3) trait variation 92  
is controlled by a shared genetic basis. In order 93  
to investigate these hypotheses, we estimated the 94  
heritability of each trait and their pairwise pheno- 95  
typic and genetic correlations. 96

**The majority of physiological traits exhibit significant 97  
genetic heritability.** To determine the contribution 98  
of genetics to phenotypic variation in each trait ir- 99  
respective of diet, we calculated heritability across 100  
all animals in the study and found that most traits 101  
measured at one year of age (31 of 36) have sig- 102  
nificant heritability (Figure 3). Body composition 103  
traits from DEXA and one measure of hearing sen- 104  
sitivity had the highest heritabilities (>0.5). Wheel 105  
running speed and distance traits had moderate 106  
(0.3-0.5) heritabilities. Several cardiac traits, in- 107  
cluding heart rate, stroke volume and cardiac out- 108  
put, as well as forepaw grip strength and time to 109  
fall on the rotarod had low (0.1-0.3) but statis- 110  
tically significant heritabilities. Traits with her- 111  
itability not significantly different from zero in- 112  
cluded two echocardiogram derived traits, and 113

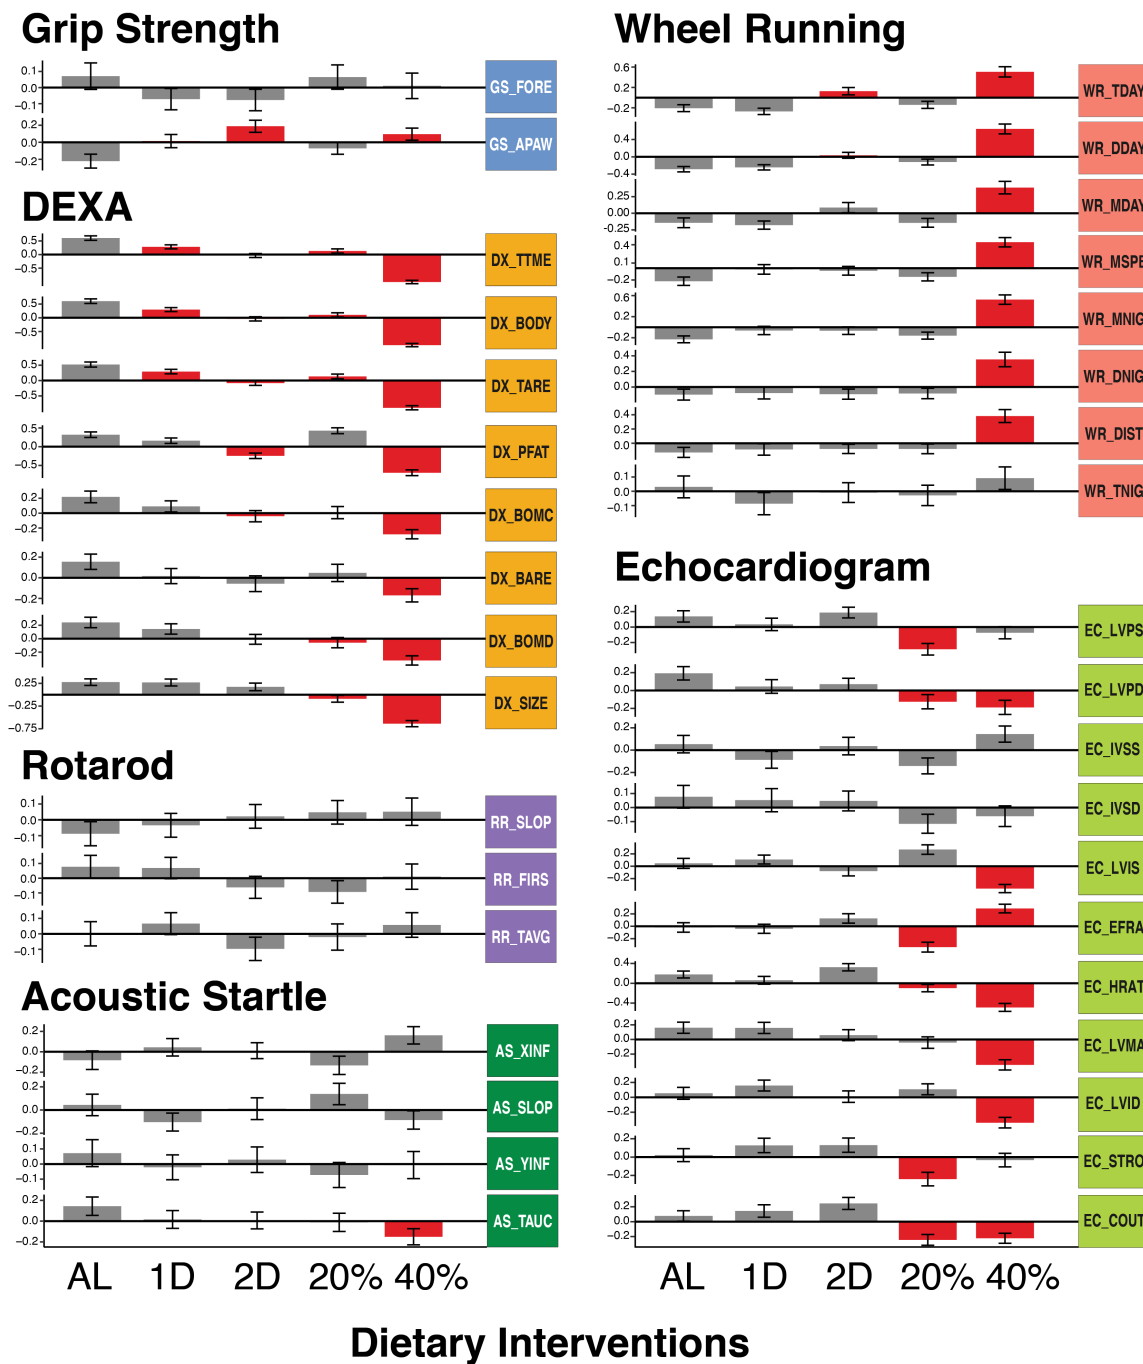

Fig. 2. Diet specific mean (SE) trait values for all experimental procedures. All trait values were z-score transformed following batch and generation correction. Red bars denote traits that were significantly different from AL diet.

1 one each for acoustic startle, rotarod, and grip  
2 strength (Figure 3).

3 **Phenotypic and genetic correlations separate distinct**  
4 **aspects of physiology.** We calculated the phenotypic  
5 correlation between all trait pairs using all  
6 samples and found that many trait pairs, especially  
7 those derived from the same assay, were tightly  
8 correlated. (Figure 4A, lower-triangle). We also  
9 calculated diet-specific correlations and found these  
10 to be very similar to correlations ob-

11 tained when using all animals (Supplemental Fig-  
12 ure S2). When diet-specific differences were ob-  
13 served, they affected the magnitude but not the  
14 sign of the correlation. For example, cardiac out-  
15 put and stroke volume (EC\_COUT, EC\_STRO) were  
16 positively correlated with body composition traits  
17 (DX\_PFAT, DX\_TARE, DX\_BODY, and DX\_TTME) in  
18 AL, 1D and 2D group, however, the correlation was  
19 reduced in 20% CR and 40% CR groups (Supple-  
20 mental Figure S2). Since the phenotypic corre-  
21 lations were largely similar across diets, we used

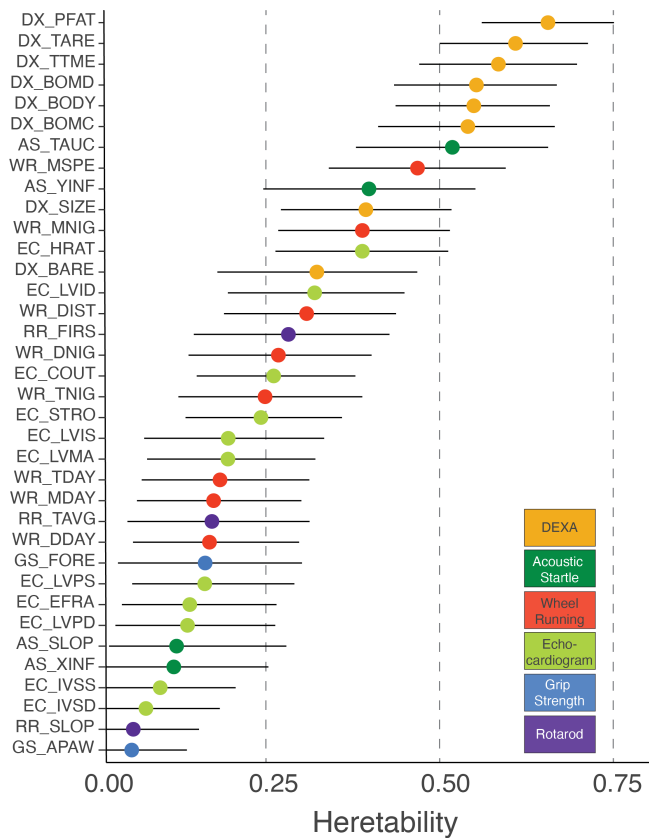

Fig. 3. Trait specific heritability (95% Bayesian credible interval) values.

1 correlations calculated from all animals in subse-  
 2 quent analyses.

3 In order to measure the degree to which the heri-  
 4 table fraction of variation in two traits was shared  
 5 we calculated their genetic correlation (Figure 4A,  
 6 upper-triangle). This value measures the correla-  
 7 tion of genetic effects on two traits, and a genetic  
 8 correlation equal to one means that every variant  
 9 that affects the first trait has an equal pleiotropic  
 10 effect on the second trait. For many traits, the  
 11 genetic and phenotypic correlations were similar  
 12 (adjusted R square of 0.62, Supplemental Figure  
 13 S3). Additionally, we identified 138 instances (out  
 14 of 630 trait pairs) for which the phenotypic correla-  
 15 tion was significantly greater than zero but the  
 16 estimated genetic correlation was indistinguishable  
 17 from zero. This suggested that, for these  
 18 trait pairs, the phenotypic correlation was due to  
 19 shared environmental factors.

20 We sought to quantify the degree of similarity be-  
 21 tween traits using an unsupervised hierarchical  
 22 clustering analysis of all pairwise phenotypic cor-  
 23 relations. We identified 10 clusters of two or more  
 24 traits and six single-trait clusters (Figure 4B). All  
 25 10 multi-trait clusters were composed of traits  
 26 from the same assay, however traits from all as-  
 27 says (except rotarod) were split across multiple  
 28 clusters in non-adjacent regions of the dendro-  
 29 gram (Figure 4B). For example, DEXA derived body

30 composition traits formed two multi-trait clusters,  
 31 the first cluster was composed of bone physiology  
 32 traits and was adjacent to a cardiac output clus-  
 33 ter, whereas the second cluster was composed of  
 34 body area/tissue composition traits and was lo-  
 35 cated within day and night time wheel running  
 36 clusters (Figure 4B). We interpret traits in distinct  
 37 clusters as measurements of distinct aspects of  
 38 physiology, with cluster placement in the dendro-  
 39 gram indicating the degree of similarity between  
 40 these aspects of physiology.

41 Multiple factors may contribute to the high cor-  
 42 relations within each multi-trait cluster: different  
 43 traits measured the same underlying physiology,  
 44 the shared environment in which traits were mea-  
 45 sured, and a shared genetic basis. In eight of 10  
 46 multi-trait clusters, nearly all trait pairs within  
 47 each cluster were significantly genetically corre-  
 48 lated with each other (Figure 4A), suggesting that  
 49 the traits that comprise these aspects of physiolo-  
 50 gy shared a common genetic basis. In the two  
 51 remaining multi-trait clusters (Rotarod and ECHO  
 52 2), trait pairs were, for the most part, not signifi-  
 53 cantly genetically correlated (Figure 4A) because  
 54 of the low genetic heritability of one or both traits  
 55 (Figure 3). This result suggested that the signifi-  
 56 cant phenotypic correlations within these clusters  
 57 was likely due to shared environmental factors. We  
 58 next sought to measure the diet-independent and  
 59 diet-dependent genetic basis of each directly mea-  
 60 sured trait using a QTL mapping approach.

61 **Genetic mapping with founder-allele-patterns iden-**  
 62 **tifies candidate variants.** Using both additive and  
 63 genotype-by-diet (GxD) interaction models, we  
 64 used the founder-of-origin genotype probabilities  
 65 to map associations for each of the 36 directly  
 66 measured traits. For the additive model, we found  
 67 16 significant QTLs (p-value < 0.05) and seven  
 68 suggestive QTLs (p-value < 0.1) among the 36 phe-  
 69 notypic traits (Table 1). In instances in which mul-  
 70 tiple traits map to the same genomic region we  
 71 count these as a single QTL. For the GxD inter-  
 72 action model, we identified two significant QTLs  
 73 -both of which were associated with cardiac phys-  
 74 iology traits- and one suggestive QTL for hearing  
 75 sensitivity (Table 1).

76 To more thoroughly interrogate aspects of physi-  
 77 ology represented by each multi-trait cluster, we  
 78 conducted a principal component analysis of the  
 79 traits in each cluster (Supplemental Table S3) and  
 80 repeated the genetic association analyses. For the  
 81 PC derived traits, we identified eight diet-inde-  
 82 pendent and one diet-dependent QTLs that were  
 83 not identified in our analysis of the directly  
 84 measured traits (Table 1).

85 To more precisely fine-map the genomic inter-



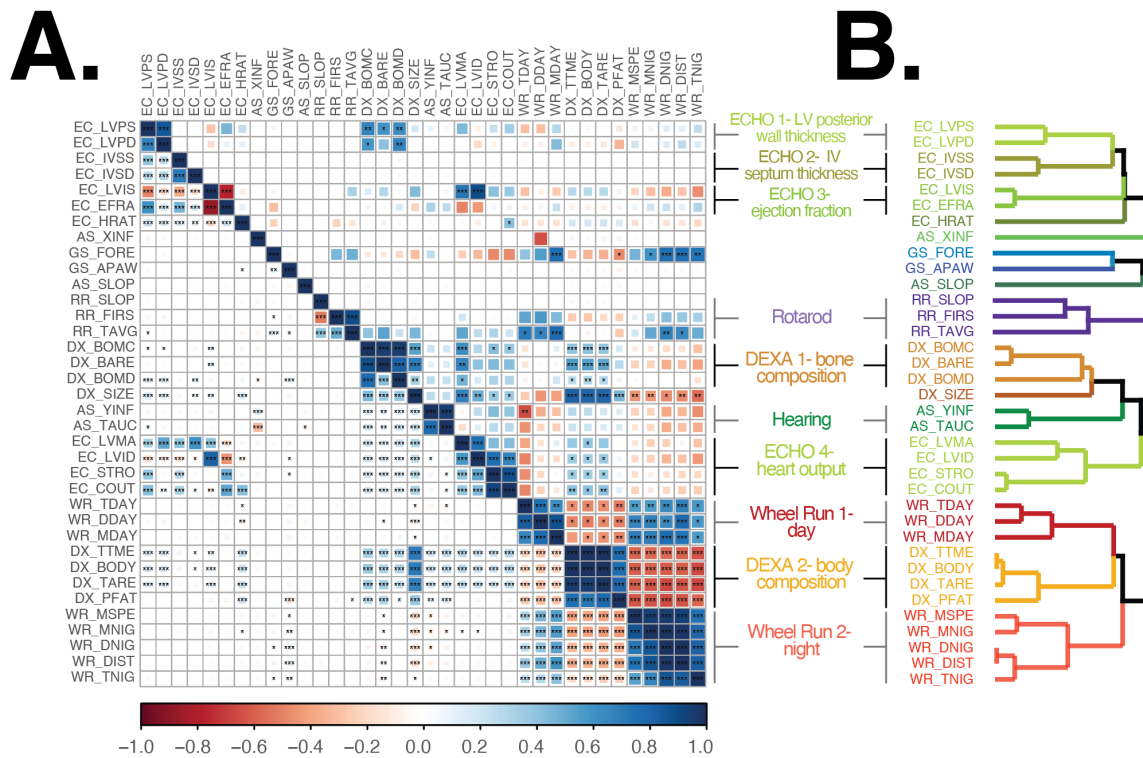

**Fig. 4. A.** Pairwise genetic (upper-triangle) and phenotypic (lower-triangle) correlations. \* p-value <0.05, \*\* p-value < 0.01, \*\*\* p-value < 0.001 (FDR adjusted p-value) **B.** Hierarchical clustering of traits used phenotypic correlation values. Each color represents a significantly distinct cluster.

1 val of each QTL, we imputed all SNPs and  
 2 small insertion-deletion variants from the fully se-  
 3 quenced DO founders (Keane *et al.* (2011)) across  
 4 a 5Mb interval centered at the lead genotyped  
 5 marker and used these variants to conduct the  
 6 fine-mapping association analysis. For each im-  
 7 puted variant, we identified the founder-of-origin  
 8 for the major and minor allele Wright *et al.* (2020).  
 9 To illustrate this process, consider a bi-allelic  
 10 A/G variant, if allele A was specific to founders  
 11 AJ, NZO, and PWK and allele G was specific  
 12 to the other 5 founders, then we assigned A to  
 13 be the minor allele and defined a founder-allele-  
 14 pattern (FAP) of AJ/NZO/PWK for this variant.  
 15 Importantly, the FAP is a measure of identity-by-  
 16 state for imputed SNPs, and contrasts with the  
 17 founder-of-origin genotype probabilities that mea-  
 18 sure identity-by-descent in the DO population.

19 To identify the variants and founder haplotypes  
 20 most likely responsible for the association at each  
 21 locus, we grouped variants based on their FAP  
 22 and ranked groups based on the largest LOD score  
 23 among its constituent variants. (Note that, by def-  
 24 inition, no variant can be a member of more than  
 25 one FAP group.) We hypothesized that the func-  
 26 tional variant(s) responsible for trait-specific vari-  
 27 ation were among those in the lead FAP group be-  
 28 cause they exhibit the strongest statistical associ-  
 29 ation and it is unlikely any additional variants are  
 30 segregating in this genomic interval beyond those

31 identified in the full genome sequences of the eight  
 32 founder strains. By focusing on FAP groups with  
 33 the largest LOD scores, we narrowed the number  
 34 of candidate variants at each QTL. The lead FAP  
 35 and the number and location of statistically sig-  
 36 nificant variants that comprise each FAP group  
 37 are summarized in Table 1. Additionally, a list of  
 38 all imputed variants significantly associated with  
 39 each trait and the candidate genes in each region  
 40 are provided in Supplemental Files 1 and 2. To  
 41 demonstrate this approach, we fine-mapped QTLs  
 42 associated with bone composition traits.

43 **Alleles of contrasting effects associated with variation**  
 44 **in bone composition.** Traits comprising the tightly  
 45 correlated bone composition cluster (Figure 4),  
 46 were associated with a chromosome 5 locus (total  
 47 bone area and mineral content) and a chromosome  
 48 7 locus (bone mineral content, Figure 5A). It is un-  
 49 surprising that the locus with the greatest LOD  
 50 score, chromosome 5, was associated with both  
 51 total bone area and bone mineral content because  
 52 these two traits are both correlated with mouse  
 53 size (Brommage (2003)). We repeated the genetic  
 54 association analysis with PC derived bone com-  
 55 position traits and found PC1 replicated the chro-  
 56 mosome 5 association and the strength of the chro-  
 57 mosome 7 association was reduced (Table 1). Ad-  
 58 ditionally, the PC1 analysis identified a new peak  
 59 on chromosome 17 and PC2 analysis identified two

| Physiological Cluster       | Trait ID                    | Chr     | p-value         | Founder Allele Pattern | FAP Rank   | FAP Interval |            | FAP Variants | Lead Candidate Genes |              |
|-----------------------------|-----------------------------|---------|-----------------|------------------------|------------|--------------|------------|--------------|----------------------|--------------|
|                             |                             |         |                 |                        |            | Start        | End        |              |                      |              |
| DEXA 1.<br>bone comp.       | PC_DXB1                     | 5       | <0.001          | AJ/129/NZO/CAST        | 1          | 40.676951    | 40.676951  | 1            | Nkx3-2               |              |
|                             |                             |         |                 | AJ/NZO                 | 2          |              | 40.595906  | 32           |                      |              |
|                             | DX_BARE                     | 5       | <0.001          | PWK/WSB                | 1          | 39.447772    | 43.024779  | 27           | Nkx3-2               |              |
|                             |                             |         |                 | NZO/CAST               | 3          | 39.750054    | 41.900135  | 13           |                      |              |
|                             | DX_BOMC                     | 5       | <0.001          | AJ/129/NZO/CAST        | 1          | 40.676951    | 40.676951  | 1            | Nkx3-2               |              |
|                             |                             |         |                 | NZO/CAST               | 2          | 39.750054    | 42.220331  | 18           |                      |              |
|                             |                             |         |                 | B6/PWK/WSB             | 3          | 39.930802    | 40.255407  | 4            |                      |              |
|                             | DX_BOMC                     | 7       | 0.037           | NZO/PWK/WSB            | 1          | 3.294757     | 4.882952   | 3            | Aurkc                |              |
|                             |                             |         |                 | B6                     | 2          | 5.498836     | 10.730083  | 24           |                      |              |
|                             | PC_DXB1                     | 7       | 0.082           | B6                     | 1          | 5.498836     | 10.730083  | 24           | Aurkc                |              |
| PC_DXB2                     | 17                          | 0.006   | B6/NOD          | 1                      | 31.61965   | 36.794365    | 7          | Ddr1         |                      |              |
|                             |                             |         | NOD             | 2                      | 33.561611  | 40.436409    | 119        |              |                      |              |
| PC_DXB1                     | 17                          | 0.033   | B6/CAST         | 1                      | 82.942619  | 83.636544    | 7          | Pkdcc,Mta3   |                      |              |
|                             |                             |         | B6/NZO/CAST/PWK | 2                      | 83.173711  | 83.270033    | 11         |              |                      |              |
| PC_DXB2                     | X                           | 0.005   | B6/CAST/WSB     | 1                      | 69.780554  | 73.330769    | 10         | -            |                      |              |
| DEXA 2.<br>body comp.       | DX_PFAT                     | 3       | 0.034           | NOD                    | 1          | 24.268712    | 26.92124   | 60           | Nlgn1                |              |
|                             | DX_PFAT                     | 4       | 0.047           | 129/CAST               | 1          | 48.783896    | 51.885719  | 25           | -                    |              |
|                             | DX_TTIME                    | 4       | 0.044           | AJ                     | 1          | 57.432344    | 62.393524  | 15           | Musk,Ugcg            |              |
|                             | DX_SIZE                     | 4       | 0.02            | AJ                     | 1          | 58.295722    | 60.267128  | 6            | Musk,Ugcg            |              |
|                             |                             |         |                 | CAST                   | 2          | 58.802827    | 59.350524  | 23           |                      |              |
|                             | PC_DXS2                     | 10      | 0.016           | NOD/NZO                | 1          | 110.460182   | 114.693547 | 3            | Tph2                 |              |
|                             |                             |         |                 | B6/NOD/NZO             | 2          | 115.058995   | 116.711414 | 5            |                      |              |
| PC_DXS2                     | 11                          | 0.065   | AJ/CAST         | 1                      | 111.32045  | 112.084464   | 22         | Kcnj16,Kcnj2 |                      |              |
| DX_TARE                     | 17                          | 0.074   | B6              | 1                      | 12.412183  | 18.30634     | 43         |              |                      |              |
| Hearing                     | AS_XINF                     | 7       | 0.089           | B6/NZO/PWK             | 1          | 13.078266    | 16.232304  | 6            | Lig1                 |              |
|                             |                             |         |                 | PWK                    | 2          | 12.999179    | 15.791595  | 41           |                      |              |
|                             | AS_XINF                     | 8       | 0.019           | 129/NOD/WSB            | 1          | 30.48983     | 30.674742  | 2            | Nrg1                 |              |
|                             |                             |         |                 | 129/NOD                | 2          | 29.86344     | 31.955227  | 2            |                      |              |
|                             | AS_YINF                     | 10      | <0.001          | CAST/PWK/WSB           | 1          | 55.66213     | 65.634751  | 441          | Cdh23                |              |
|                             | AS_TAUC                     | 10      | <0.001          | CAST/PWK/WSB           | 1          | 59.59402     | 67.81307   | 354          | Cdh23                |              |
|                             | PC_ACS1                     | 10      | <0.001          | CAST/PWK/WSB           | 1          | 59.59402     | 67.938722  | 355          | Cdh23                |              |
| AS_SLOP                     | 13                          | 0.013   | AJ/PWK          | 1                      | 107.683859 | 108.921283   | 6          | Pde4d        |                      |              |
|                             |                             |         | AJ              | 2                      | 106.702389 | 107.189894   | 2          |              |                      |              |
| ECHO 1.                     | EC_LVPD                     | 6       | 0.018           | AJ/129/NOD/CAST        | 1          | 4.026123     | 9.375212   | 15           | Col1a2               |              |
| LV posterior wall thickness | PC_ECL1                     | 6       | 0.018           | AJ/129/NOD/CAST        | 1          | 4.026123     | 9.375212   | 15           | Col1a2               |              |
| ECHO 4.                     | PC_ECC3                     | 4       | 0.038           | AJ/CAST                | 1          | 79.909399    | 82.052705  | 12           | Ptprd                |              |
| cardiac output              | PC_ECC2                     | 18      | 0.045           | 129/NOD/NZO            | 1          | 36.709005    | 38.111135  | 4            | Kcnn4                |              |
|                             |                             |         |                 | NOD/NZO                | 2          | 38.25979     | 39.03838   | 5            |                      |              |
|                             | EC_LVID                     | X       | 0.098           | NZO                    | 1          | 49.91309     | 50.30859   | 2            | -                    |              |
|                             |                             |         | B6/WSB          | 2                      | 50.640198  | 50.64876     | 3          |              |                      |              |
| Wheel Run 1. day            | WR_MDAY                     | 18      | 0.051           | NZO/CAST/WSB           | 1          | 58.502569    | 60.484421  | 14           | -                    |              |
| Wheel Run 2. night          | WR_MNIG                     | 4       | 0.097           | AJ/129/NZO             | 1          | 77.735404    | 81.435051  | 20           | Ptprd                |              |
|                             | PC_WRN2                     | 15      | 0.017           | CAST/PWK               | 1          | 39.026308    | 47.936594  | 90           | Trhr                 |              |
| Rotarod                     | PC_ROR1                     | 6       | 0.079           | B6/WSB                 | 1          | 77.027818    | 82.136588  | 20           | Ctnna2               |              |
|                             | RR_FIRS                     | 6       | 0.069           | B6/WSB                 | 1          | 77.027818    | 82.136588  | 20           | Ctnna2               |              |
| Interaction                 | ECHO 1.                     | PC_ECL1 | 2               | 0.023                  | B6/129/NZO | 1            | 31.005111  | 34.784299    | 31                   | Hmcn1, Lmx1b |
|                             | LV posterior wall thickness | EC_LVPD | 2               | 0.027                  | B6/129/NZO | 1            | 32.914841  | 34.073575    | 18                   | Lmx1b        |
|                             | ECHO 3.-ejection fraction   | PC_ECE2 | 16              | 0.033                  | AJ         | 1            | 34.986815  | 38.326179    | 18                   | Fstl1        |
| Hearing                     | AS_YINF                     | 9       | 0.095           | NZO/CAST/PWK           | 1          | 98.839327    | 99.729097  | 38           | Pik3cb               |              |

**Table 1. Genome-wide significant diet-independent and diet-dependent QTLs.** Traits are organized by clusters identified in Figure 4. For each trait, we calculated a genome-wide significant LOD score threshold using a permutation analysis. We identified the FAP of the variant with the strongest LOD score, the genomic location of these variants, and the number of significant variants that comprise the lead FAP group. For loci in which the lead FAP is comprised of fewer than 10 variants, we also present results for the second ranked FAP. We list likely candidate genes based on lead FAP variants and a survey of gene knock-out phenotypes.

1 new QTLs on chromosomes 17 and X (Figure 5B).  
2 To identify candidate variants and genes, we fine-  
3 mapped these loci using the FAP group of each im-  
4 puted variant.

5 We fine-mapped the chromosome 5 loci associated  
6 with total bone area (DX\_BARE) and bone mineral  
7 content (DX\_BOMC). The two lead FAPs -ranked by  
8 maximum LOD score of each FAP variant group-  
9 for DX\_BARE contained variants with minor al-  
10 leles specific to the PWK and WSB founders and

the rank 3 FAP was comprised of NZO and CAST  
(Figure 5C). The PWK and WSB alleles were asso-  
ciated with the largest positive effect of the eight  
founders on total bone area, whereas NZO and  
CAST were associated with the largest negative  
effect (Figure 5C). Next, we examined the fine-  
mapping results for DX\_BOMC and identified a dif-  
ferent order of lead FAPs: rank 1 and 2 groups con-  
tained minor alleles specific to the NZO and CAST  
founders whereas the rank 3 group was comprised

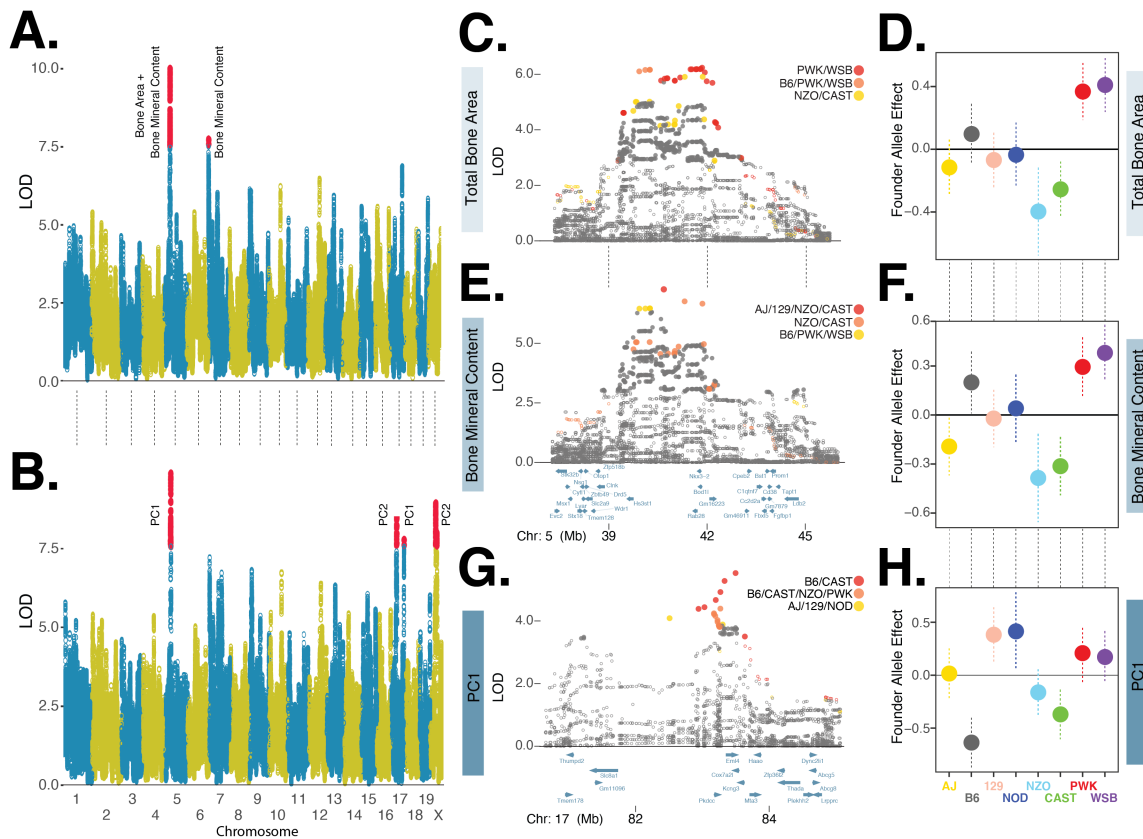

**Fig. 5.** A. Manhattan plot of directly measured bone composition traits: total bone area and bone mineral content. Red circles denote markers with statistically significant ( $p < 0.05$ ) LOD score based on genome-wide permutation analysis. B. Manhattan plot of PC derived bone physiology traits. C. Fine mapping of total bone area chromosome 5 locus using imputed variants. LOD scores of closed circles are statistically significant ( $p < 0.05$ ) based on permutation analysis of all imputed variants with  $\pm 5$ Mb of lead genotyped marker. Variants in three founder-allele-pattern groups shown in red, orange, and yellow circles, ordered by maximum LOD score. D. Founder allele effects and standard error estimates for the lead genotyped variant for total bone area. E. and F. are for bone mineral content, details are the same as C. and D. G. and H are for the bone composition-PC1 chromosome 17 locus, details are the same as in C. and D.

1 of PWK and WSB (Figure 5D). The effect of the  
 2 founder alleles on bone mineral content (Figure  
 3 5E) were similar to results for total bone area (Fig-  
 4 ure 5C). Although the rank order of the top three  
 5 FAP groups differed slightly between the two traits,  
 6 these results are consistent with the hypothesis  
 7 that this one locus affects these two highly similar  
 8 traits. Moreover, we have identified at least three  
 9 distinct alleles at this locus: a positive allele de-  
 10 rived from the PWK and WSB founders, a negative  
 11 allele derived from the NZO and CAST founders,  
 12 and a neutral allele derived from the four other  
 13 founders.

14 To further illustrate the utility of fine mapping  
 15 QTLs with variants grouped by FAP, we examined  
 16 the chromosome 17 locus associated with bone  
 17 composition PC1 (Figure 5B). We found that vari-  
 18 ants with minor alleles specific to the B6 and CAST  
 19 founders exhibited the strongest statistical asso-  
 20 ciation (Figure 5G). Consistent with the composi-  
 21 tion of this lead FAP, we found the effect of the  
 22 B6 and CAST founder alleles to have the largest  
 23 negative effects on bone composition PC1 (Figure  
 24 5H). We next used FAP grouped variants and the  
 25 Mouse Genome Informatics database of pheno-

typic effects ([www.informatics.jax.org](http://www.informatics.jax.org)) to identify  
 candidate genes.

The chromosome 5 total bone area QTL contained  
 406 significant variants, of which 27 (21 intergenic  
 SNPs, 6 intronic SNPs) were specific to the positive  
 effect PWK/WSB alleles (rank 1 FAP group) and 13  
 (12 intergenic SNPs and 1 intronic SNP) were spe-  
 cific to the negative effect NZO/CAST alleles (rank  
 3 FAP group; Table 1, Figure 5C). The chromosome  
 5 bone mineral content QTL contained 350 sig-  
 nificant variants, of which 4 intergenic SNPs were  
 specific to the positive B6/PWK/WSB alleles (rank  
 3 FAP group) and 19 (17 intergenic SNPs and 2  
 intronic SNPs) were specific to the negative effect  
 NZO/CAST alleles (rank 1 and 2 FAP groups; Fig-  
 ure 5E). We found no protein coding variants in the  
 lead FAP groups that were significantly associated  
 with either trait, suggesting that the functional  
 variant(s) altered gene expression. Many candi-  
 date variants were located in intergenic regions  
 adjacent to *Nkx3-2* (Figure 5C,E), which encodes  
 a homeobox protein critical to skeleton develop-  
 ment (Lettice *et al.* (1999)). The chromosome 17  
 locus associated with bone composition PC1, was  
 comprised of 47 statistically significant variants,

seven of which were members of the B6/CAST FAP (Figure 5G). All of these variants were intergenic SNPs located in a genomic interval containing five genes (*Pkdcc*, *Eml4*, *Cox7a21*, *Kcng3*, and *Mta3*) and of these candidates *Pkdcc* has previously been shown to effect bone morphology (Sajan *et al.* (2019); Imuta *et al.* (2009)).

These analyses illustrate three key findings: 1) conducting genetic association analyses with both directly measured and PC derived traits can reveal novel loci, 2) fine mapping loci with FAP groups greatly reduces the number of lead candidate variants, and 3) FAP variant groups illuminate the link between specific founder haplotypes associated with positive, neutral, or negative phenotypic effects.

**Cardiac physiology is altered in response to dietary intervention in a genotype dependent manner.** All three significant diet-dependent QTLs were associated with cardiac physiology traits (Table 1). We identified one QTL associated with the second PC (PC2\_ECE2) of ejection fraction (EC\_EFRA) and left ventricular inner dimension, systole (EC\_LVIS) (Figure 6A). These two traits are positively correlated with PC2\_ECE2 (Supplemental Figure S4), which we interpreted as a measure of heart pumping efficiency. We fine-mapped this QTL and found the lead FAP was composed of AJ-specific alleles (Figure 6A). The remaining QTLs were associated with diastolic left ventricular posterior wall thickness (EC\_LVPD) and the first principal component (PC\_ECL1) of EC\_LVPD and EC\_LVPS, systolic left ventricular posterior wall thickness (Table 1). EC\_LVPD and EC\_LVPS are positively correlated (Figure 4A) and, unsurprisingly, the QTLs for PC\_ECL1 and EC\_LVPD were located in the same region of chromosome 2 and shared the same lead FAP: B6/129/NZO (Figure 6B,C). We found the genomic interval associated with PC\_ECL1 to be larger than EC\_LVPD (30.9-34.8Mb versus 32.9-34.1Mb) and fine-mapping EC\_LVPS revealed a region of association between 30.5 and 32.0 Mb (Supplemental Figure S5). Although the size of our mapping population limits our ability to conclude whether the associations with systolic and diastolic wall thickness are separate loci affected by distinct functional variants, this result does explain the subtle difference between the fine mapped intervals for PC\_ECL1 and EC\_LVPD (Figure 6B,C). We next set out to determine which dietary intervention(s) were responsible for these genotype-by-diet interaction effects.

In order to determine the diet most likely responsible for the significant GxD interaction effects, we compared the lead variant LOD score in the full model to reduced models in which we pruned

diets in singles and pairs. We considered a diet as likely responsible for the significant interaction effect if the removal of that diet reduced the strength of the association in comparison to the full model. For PC\_ECE2, we found that 20% CR and 2D fast treatments were most likely responsible for the diet-dependent association (Supplemental Table S4). The diet-specific founder-allele effect for the AJ allele exhibited the largest positive effects in the 20% CR and 2D fast treatments and significant negative effects in AL and 40% CR treatments (Figure 6D). These results are consistent with the hypothesis that the diet-dependent effects of the AJ allele were responsible for the interaction association at this locus.

We identified 18 variants significantly associated with PC\_ECE2 and all of these were specific to the lead FAP, AJ. A single variant was an intergenic structural variant, and the remaining 17 were non-coding exonic (1), intronic (4) or intergenic (12) located at nine genes. One variant was located in the 3' UTR of Follistatin-like 1 (*Fstl1*), this is a secreted glycoprotein expressed in the adult heart that affects cardiac morphology, contractility, and vascularization (Oshima *et al.* (2008); Shimano *et al.* (2011)).

We next examined the diet-dependent associations with EC\_LVPD and PC\_ECL1 and, using the reduced GxD association model test, found that 20% CR and 1D fast treatments were most likely responsible for this interaction QTL (Supplemental Table S4). We estimated the diet-specific founder-allele effects for the lead variant at this QTL and focused on the effects of B6, 129 and NZO. We estimated distinct diet-specific effects for each founder: the effect of B6 was significantly negative in 40% CR, positive in 20% CR (for EC\_LVPD only), and largely neutral in the other three diets; the effect of 129 was significantly positive in the 1D fast treatment and negative in the other four diets; the effect of NZO was significantly positive in 20% CR, neutral in AL, and negative in the other three diets (Figure 6E,F). Although the B6 allele was identified in the lead FAP, the effect size results suggest this allele was unlikely to be responsible for the GxD interaction association. The seeming incongruence between the FAP and effect-size estimates illustrates a key point: FAPs were annotated using imputed variants and reflect identity-by-state whereas effect-sizes were estimated using the founder-of-origin probabilities and reflect identity-by-descent (as described in Methods section). These results were consistent with the hypothesis that either 129 or NZO founder alleles were responsible for the significant interaction QTL because of the strong diet-specific effect of the 129 allele in 1D fast and NZO allele in

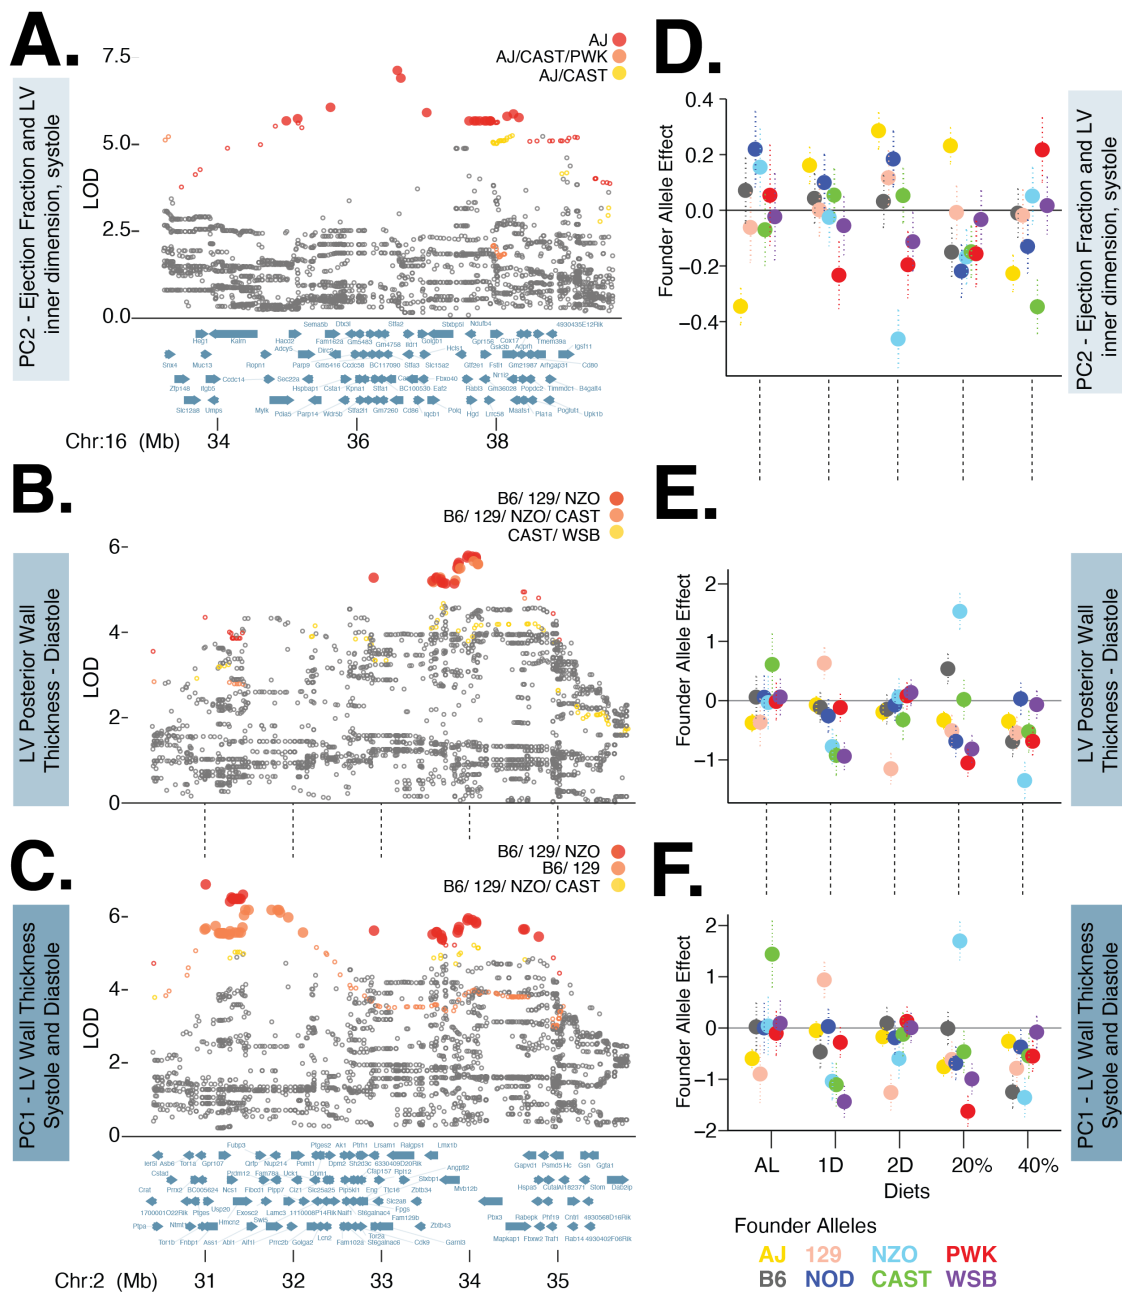

**Fig. 6.** A. Fine mapping of chromosome 16 locus associated with PC2 of ejection fraction and left ventricular inner dimension, systole. Rank 1, 2, and 3 FAP variants shown in red, orange, and yellow circles. LOD scores of closed circles are statistically significant ( $p < 0.05$ ) based on permutation analysis of all imputed variants with  $\pm 5$ Mb of lead genotyped marker. B. Fine mapping of chromosome 2 locus associated with left ventricular posterior wall thickness, systole. Legend same as A. C. Fine mapping of chromosome 2 locus associated with PC1 of left ventricular posterior wall thickness, systole and diastole. Legend same as A. D-F. Diet-specific effect of lead genotyped variant for each of the eight founder variants for three focal traits.

1 20% CR. Additionally, these results would be con- 12  
 2 sistent with the hypothesis that both founder al- 13  
 3 leles are responsible and, given our observation of 14  
 4 contrasting diet specific effects, each may harbor 15  
 5 distinct functional variants at this QTL. 16

6 We identified a total of 59 and 28 vari- 17  
 7 ants significantly associated with PC\_ECL1 and 18  
 8 EC\_LVPD. Thirty one PC\_ECL1 variants and 19  
 9 EC\_LVPD variants were specific to the lead FAP 20  
 10 (B6/129/NZO) and all variants were SNPs. Vari- 21  
 11 ants associated with PC\_ECL1 (19 intronic and 22

12 intergenic) were located in close proximity 12  
 13 to 10 genes. Ten variants (eight intronic and 13  
 14 two immediately upstream) were located at Hemi- 14  
 15 centin2, a fibulin family extracellular matrix pro- 15  
 16 tein. Genetic knock-out studies of *Hmcn2* have 16  
 17 resulted in abnormal left ventricular morphology in 17  
 18 mice (Dickinson *et al.* (2016)) and have been as- 18  
 19 sociated with electrocardiogram derived traits in 19  
 20 humans (Tereshchenko *et al.* (????)). Additionally, 20  
 21 three variants (intronic) were located at *Lmx1b*, 21  
 22 a LIM homeobox transcription factor 1-beta that 22

1 is known to regulate limb and organ develop- 57  
2 ment (Dreyer *et al.* (1998); Schweizer *et al.* (2004); 58  
3 Doucet-Beaupré *et al.* (2016)). Variants associated 59  
4 with EC\_LVPD (9 intronic and 9 intergenic) were 60  
5 located in close proximity to 5 genes, a list which 61  
6 included *Lmx1b* and lacked *Hmcn2*. 62

7 Taken together, all significant diet-dependent 63  
8 QTLs were associated with heart physiology. Fine 64  
9 mapping with FAPs narrowed the likely number 65  
10 of causal variants and identified candidate genes 66  
11 previously linked to cardiac morphology or func- 67  
12 tion. We previously showed that the signs of the 68  
13 effects of diet on the mean physiological trait mea- 69  
14 surements were specific to the type of intervention 70  
15 (CR or IF) and their magnitudes were non-additive 71  
16 with respect to the magnitude of intervention (Fig- 72  
17 ure 2). Identification of candidate genes with 73  
18 diet-dependent effects suggests molecular mech- 74  
19 anisms to explain these results. 75

## 20 Discussion

21 **Conditionally beneficial effects of CR and IF on dis-** 76  
22 **tinct aspects of physiology** . A primary goal of this 77  
23 study was to address the question: which aspects 78  
24 of physiology would respond to dietary interven- 79  
25 tion in early adulthood mice? We performed this 80  
26 experiment using DO mice in order to assess this 81  
27 question in an outbred genetic model that more 82  
28 closely resembles human populations. Addition- 83  
29 ally, we were interested in determining whether 84  
30 the physiological health benefits (or detriments) 85  
31 of daily CR could be replicated with intermittent 86  
32 fasting treatments. We found dietary intervention 87  
33 initiated at six months of age significantly altered 88  
34 many traits in 12 month old mice. The 40% CR 89  
35 dietary intervention impacted the greatest num- 90  
36 ber of traits in comparison to the AL diet followed 91  
37 by the 20% CR, 2D and 1D fast treatments (Figure 92  
38 2). Using six experimental assays we clustered in- 93  
39 dividual traits into distinct aspects of physiology 94  
40 (Figure 4). In many instances, changes to an as- 95  
41 pect of physiology were not consistent between IF 96  
42 and CR. For the body composition cluster, we ob- 97  
43 served similar mean body weights for the 20% CR 98  
44 and 2D fast treatments, however the 2D fast treat- 99  
45 ment significantly increased the proportion of lean 100  
46 muscle mass and reduced fat mass, whereas the 101  
47 20% CR decreased the percentage of lean mus- 102  
48 cle mass and increased fat mass (Figure 2). How 103  
49 might these changes in physiology impact organ- 104  
50 ismal health? 105

51 While the lifespan extension of daily CR is well 106  
52 established, it remains largely unknown whether 107  
53 dietary intervention would improve physiological 108  
54 function in healthy, early adulthood mice. Our 109  
55 results demonstrated that 2D fast and 40% CR, 110  
56 in comparison to 20% CR, improved multiple as-

pects of cardiovascular function. Left ventricular 57  
posterior wall thickness (systolic and diastolic) in- 58  
creased in 2D fast but decreased in 20% CR, and 59  
these changes in morphology were correlated with 60  
cardiac function - ejection fraction and stroke vol- 61  
ume increased in 2D fast and decreased in 20% 62  
CR (Figure 2). Similar to the 2D fast treatment, 63  
we observed a decrease in posterior wall thickness 64  
for 40% CR and an increase in cardiac function - 65  
measured as increased ejection fraction and stroke 66  
volume after controlling for the dramatic decrease 67  
in body weight observed in the 40% CR mice (Fig- 68  
ure 2, Supplemental Figure S1F). Ejection frac- 69  
tion was previously shown to decrease with mouse 70  
age and is indicative of decreased cardiac health 71  
(Medrano *et al.* (2016); Lindsey *et al.* (2018)), there- 72  
fore we interpret these results to suggest that the 73  
2D fast and 40% CR treatments increased cardiac 74  
health relative to 20% CR. These results highlight 75  
the complex manner in which the type and mag- 76  
nitude of dietary intervention may improve or de- 77  
grade cardiac health and may explain the seem- 78  
ingly contradictory results of IF and CR interven- 79  
tions observed in other rodent models (Ahmet *et al.* 80  
(2005, 2011)). 81

Examining the effect of dietary intervention on 82  
other aspects of physiological health suggest that 83  
the 40% CR treatment was not universally benefi- 84  
cial. The 40% CR group had the lowest hearing 85  
ability across the entire auditory range tested, 86  
whereas hearing ability was greatest in the AL 87  
group (Figure 2). These results contradict pre- 88  
vious studies that found caloric restriction pre- 89  
vented age-related hearing loss (Someya *et al.* 90  
(2007, 2010)). Similar to hearing ability, we ob- 91  
served bone mineral density was lowest in 40% 92  
CR and greatest in AL diet (DX\_BOMD; Figure 2). 93  
These result were consistent with human clinical 94  
trial which showed cardiovascular function was 95  
improved and bone mineral density was degraded 96  
following a 25% CR intervention (Villareal *et al.* 97  
(2006, 2016); Kraus *et al.* (2019)). By measur- 98  
ing multiple aspects of physiology in a large out- 99  
bred mouse population, we identified contrasting 100  
effects of CR and IF on health. With continued 101  
observation, we will determine whether the year 102  
one effects will have lasting physiological effects on 103  
health and explain the physiological mechanisms 104  
by which dietary intervention extends lifespan. 105

**The effect of select genetic variants on physiologi-** 106  
**cal health may be as impactful as dietary interven-** 107  
The majority of traits (31 of 36) derived from 108  
six phenotypic assays exhibited significant genetic 109  
heritabilities (Figure 3). Genetic mapping analyses 110  
with directly measured and PC derived traits iden- 111  
tified both diet-independent and diet-dependent 112

1 QTLs associated with distinct aspects of physi- 57  
2 ology (Table 1). We found the effect of founder 58  
3 alleles at some QTLs were as strong or stronger than 59  
4 the effect of dietary intervention. For instance, the 60  
5 difference between positive and negative founder-  
6 allele-effects for the lead genotyped variant at the  
7 chromosome 5 bone mineral content QTL (0.77,  
8 Figure 5F) exceeded the negative effect of 40%  
9 CR diet (-0.57). This suggested that the poten-  
10 tially detrimental effect of 40% CR on bone min-  
11 eral content may be offset by the beneficial effect  
12 of the PWK and WSB founder alleles. Similarly,  
13 the negative effect of 40% CR on hearing ability  
14 (-0.31) could be offset by the significantly posi-  
15 tive effect of the WSB, PWK, CAST alleles (1.19)  
16 at the chromosome 10 QTL (Table 1). The can-  
17 didate genes at these loci maybe fruitful targets  
18 for genetic manipulation or therapeutic interven-  
19 tion to either mimic beneficial or ameliorate detri-  
20 mental effects of caloric restriction and intermit-  
21 tent fasting. Finally, the extensive genetic corre-  
22 lations identified between traits, both within and  
23 between clusters, suggests that interventions may  
24 have pleiotropic effects (perhaps positive or nega-  
25 tive) beyond the focal trait.

26 **Cardiac morphology and function is shaped by**  
27 **diet-dependent genetic associations.** Cardiac mor-  
28 phology and function were the only physiologi-  
29 cal traits for which we identified significant diet-  
30 dependent QTLs. Variation in cardiac pumping ef-  
31 ficiency, quantified with PC\_ECE2, was associated  
32 with an AJ specific allele that increased function  
33 in 20% CR, 1D, and 2D fast treatments and de-  
34 creased function in the AL and 40% CR treatments  
35 (Figure 6D). Interestingly, the diet-dependent ef-  
36 fect of the NZO allele at this locus was nearly op-  
37 posite that of AJ and the difference between these  
38 alleles in the AL (0.500) and 2D fast (0.746) treat-  
39 ments was of similar magnitude of the difference  
40 between diets (0.631). We highlight this example to  
41 illustrate that the beneficial or detrimental effects  
42 of diet maybe ameliorated by genetic variants seg-  
43 regating within the DO mouse population. These  
44 results provide additional support for the hypoth-  
45 esis that cardiac efficiency maybe altered to the  
46 same degree as CR or IF with genetic manipulation  
47 or therapeutic intervention to phenocopy the AJ  
48 or NZO allele. Additionally, the large diet-specific  
49 effects of the 129 and NZO alleles (Figure 6E,F)  
50 suggest that similar approach could be utilized to  
51 manipulate LV posterior wall thickness. The de-  
52 cline in cardiac health in response to diet and age  
53 is a leading risk factor for reduced lifespan in hu-  
54 man populations (Dwyer-Lindgren *et al.* (2016)).  
55 These results clearly demonstrate that functional  
56 variants are segregating within the DO population

to modulate cardiac morphology and function in  
a diet-specific manner and suggest possible inter-  
ventions to protect against the diet-induced or age-  
related decline of cardiac health.

**Future considerations and limitations.** In summary,  
we found that multiple aspects of physiology in  
early adulthood mice change in response to di-  
etary intervention. Using a diverse set of experi-  
mental assays, we identified dietary interventions  
that may improve or degrade health along multi-  
ple axes of physiology. It is unknown how changes  
observed at one year of age, after six months of  
treatment, will impact health at later ages. As  
these mice age, we will continue to monitor them  
with the ultimate goal of identifying the physio-  
logical mechanisms by which dietary interventions  
improve or deteriorate health at advanced age.

## Acknowledgments

The authors would like to acknowledge Na-  
talie Telis, J. Graham Ruby, Nick van Bruggen  
and David Botstein for their comments on the  
manuscript. Funding was provided by Calico Life  
Sciences LLC.

## Literature Cited

- Ahmet, I., H. J. Tae, R. de Cabo, E. G. Lakatta, and  
M. I. Talan, 2011 Effects of calorie restriction  
on cardioprotection and cardiovascular health.  
*Journal of Molecular and Cellular Cardiology*  
**51**: 263–271.
- Ahmet, I., R. Wan, M. P. Mattson, E. G. Lakatta,  
and M. Talan, 2005 Cardioprotection by inter-  
mittent fasting in rats. *Circulation* **112**:  
3115–3121.
- Benjamini, Y. and Y. Hochberg, 1995 Controlling  
the False Discovery Rate: A Practical and Power-  
ful Approach to Multiple Testing. *Journal of the  
Royal Statistical Society: Series B (Methodologi-  
cal)* **57**: 289–300.
- Broman, K. W., D. M. Gatti, P. Simecek, N. A.  
Furlotte, P. Prins, *et al.*, 2019 R/qlt2: Software  
for mapping quantitative trait loci with high-  
dimensional data and multiparent populations.  
*Genetics* **211**: 495–502.
- Brommage, R., 2003 Validation and calibration of  
DEXA body composition in mice. *American Jour-  
nal of Physiology-Endocrinology and Metabolism*  
**285**: E454–E459.
- Bruss, M. D., C. F. Khambatta, M. A. Ruby,  
I. Aggarwal, and M. K. Hellerstein, 2010 Calo-  
rie restriction increases fatty acid synthesis  
and whole body fat oxidation rates. *Ameri-  
can Journal of Physiology - Endocrinology and  
Metabolism* **298**: 108–116.

LITERATURE CITED

- 1 Cao, S. X., J. M. Dhahbi, P. L. Mote, and S. R.  
2 Spindler, 2001 Genomic profiling of short- and  
3 long-term caloric restriction effects in the liver of  
4 aging mice. *Proceedings of the National Academy  
5 of Sciences of the United States of America* **98**:  
6 10630–10635.
- 7 Carpenter, B., A. Gelman, M. D. Hoffman, D. Lee,  
8 B. Goodrich, *et al.*, 2017 Stan: A probabilistic  
9 programming language. *Journal of Statistical  
10 Software* **76**.
- 11 Churchill, G. A. and R. W. Doerge, 1994 Empirical  
12 threshold values for quantitative trait mapping.  
13 *Genetics* **138**.
- 14 Churchill, G. A., D. M. Gatti, S. C. Munger,  
15 and K. L. Svenson, 2012 The Diversity Out-  
16 bred mouse population. *Mammalian Genome*  
17 **23**: 713–718.
- 18 Colman, R. J., R. M. Anderson, S. C. Johnson,  
19 E. K. Kastman, K. J. Kosmatka, *et al.*, 2009  
20 Caloric restriction delays disease onset and mor-  
21 tality in rhesus monkeys. *Science* **325**: 201–  
22 204.
- 23 Commo, F. and B. M. Bot, 2016 N-Parameter Lo-  
24 gistic Regression [R package nplr version 0.1-7]  
25 .
- 26 Crawley, J. N., 2007 *What's Wrong With My  
27 Mouse?*. John Wiley & Sons, Inc., Hoboken, NJ,  
28 USA.
- 29 Dhahbi, J. M., H. J. Kim, P. L. Mote, R. J. Beaver,  
30 and S. R. Spindler, 2004 Temporal linkage be-  
31 tween the phenotypic and genomic responses to  
32 caloric restriction. *Proceedings of the National  
33 Academy of Sciences of the United States of  
34 America* **101**: 5524–5529.
- 35 Dickinson, M. E., A. M. Flenniken, X. Ji, L. Teboul,  
36 M. D. Wong, *et al.*, 2016 High-throughput dis-  
37 covery of novel developmental phenotypes. *Nature*  
38 **537**: 508–514.
- 39 Doucet-Beaupré, H., C. Gilbert, M. S. Profes,  
40 A. Chabrat, C. Pacelli, *et al.*, 2016 Lmx1a and  
41 Lmx1b regulate mitochondrial functions and  
42 survival of adult midbrain dopaminergic neu-  
43 rons. *Proceedings of the National Academy of  
44 Sciences of the United States of America* **113**:  
45 E4387–E4396.
- 46 Dreyer, S. D., G. Zhou, A. Baldini, A. Winterpacht,  
47 B. Zabel, *et al.*, 1998 Mutations in LMX1B cause  
48 abnormal skeletal patterning and renal dyspla-  
49 sia in nail patella syndrome. *Nature Genetics* **19**:  
50 47–50.
- 51 Dwyer-Lindgren, L., A. Bertozzi-Villa, R. W.  
52 Stubbs, C. Morozoff, M. J. Kutz, *et al.*, 2016 US  
53 County-Level Trends in Mortality Rates for Major  
54 Causes of Death, 1980–2014. *JAMA* **316**: 2385.
- 55 Escabi, C. D., M. D. Frye, M. Trevino, and E. Lo-  
56 barinas, 2019 The rat animal model for noise-  
57 induced hearing loss. *The Journal of the Acous-  
tical Society of America* **146**: 3692–3709.
- 58 Furlotte, N. A. and E. Eskin, 2015 Efficient  
59 multiple-trait association and estimation of ge-  
60 netic correlation using the matrix-variate linear  
61 mixed model. *Genetics* **200**: 59–68.
- 62 Gelman, A. and D. B. Rubin, 1992 Inference from  
63 Iterative Simulation Using Multiple Sequences.  
64 *Statistical Science* **7**: 457–472.
- 65 Goodrick, C. L., D. K. Ingram, M. A. Reynolds, J. R.  
66 Freeman, and N. Cider, 1990 Effects of inter-  
67 mittent feeding upon body weight and lifespan  
68 in inbred mice: interaction of genotype and age.  
69 *Mechanisms of Ageing and Development* **55**: 69–  
70 87.
- 71 Gräff, J., M. Kahn, A. Samiei, J. Gao, K. T. Ota,  
72 *et al.*, 2013 A dietary regimen of caloric restric-  
73 tion or pharmacological activation of SIRT1 to  
74 delay the onset of neurodegeneration. *Journal  
75 of Neuroscience* **33**: 8951–8960.
- 76 Gredilla, R. and G. Barja, 2005 The role of oxida-  
77 tive stress in relation to caloric restriction and  
78 longevity **146**: 3713–3717.
- 79 Gulinello, M., H. A. Mitchell, Q. Chang, W. Timothy  
80 O'Brien, Z. Zhou, *et al.*, 2019 Rigor and repro-  
81 ducibility in rodent behavioral research. *Neuro-  
82 biology of Learning and Memory* **165**: 106780–  
83 106780.
- 84 Halagappa, V. K. M., Z. Guo, M. Pearson, Y. Mat-  
85 suoka, R. G. Cutler, *et al.*, 2007 Intermit-  
86 tent fasting and caloric restriction ameliorate  
87 age-related behavioral deficits in the triple-  
88 transgenic mouse model of Alzheimer's disease.  
89 *Neurobiology of Disease* **26**: 212–220.
- 90 Harper, J. M., C. W. Leathers, and S. N. Austad,  
91 2006 Does caloric restriction extend life in wild  
92 mice? *Aging Cell* **5**: 441–449.
- 93 Heilbronn, L. K. and E. Ravussin, 2003 Calorie  
94 restriction and aging: Review of the literature  
95 and implications for studies in humans **78**: 361–  
96 369.
- 97 Hood, R. D., 2011 *Developmental and Reproductive  
98 Toxicology*. CRC Press.
- 99 Imuta, Y., N. Nishioka, H. Kiyonari, and H. Sasaki,  
100 2009 Short limbs, cleft palate, and delayed for-  
101 mation of flat proliferative chondrocytes in mice  
102 with targeted disruption of a putative protein ki-  
103 nase gene, Pkdcc (AW548124). *Developmental  
104 Dynamics* **238**: 210–222.
- 105 Kaerberlein, M., R. W. Powers, K. K. Steffen, E. A.  
106 Westman, D. Hu, *et al.*, 2005 Cell biology: Reg-  
107 ulation of yeast replicative life span by TOR and  
108 Sch9 response to nutrients. *Science* **310**: 1193–  
109 1196.
- 110 Kafkafi, N., J. Agassi, E. J. Chesler, J. C. Crabbe,  
111 W. E. Crusio, *et al.*, 2018 Reproducibility and  
112 replicability of rodent phenotyping in preclinical  
113 studies **87**: 218–232.
- 114



- 1 Kang, H. M., N. A. Zaitlen, C. M. Wade, A. Kirby,  
2 D. Heckerman, *et al.*, 2008 Efficient control of  
3 population structure in model organism associ-  
4 ation mapping. *Genetics* **178**: 1709–1723.
- 5 Keane, T. M., L. Goodstadt, P. Danecek, M. A.  
6 White, K. Wong, *et al.*, 2011 Mouse genomic vari-  
7 ation and its effect on phenotypes and gene reg-  
8 ulation. *Nature* **477**: 289–294.
- 9 Kim, J. U., H. J. Lee, H. H. Kang, J. W. Shin,  
10 S. W. Ku, *et al.*, 2005 Protective Effect of Isoflu-  
11 rane Anesthesia on Noise-Induced Hearing Loss  
12 in Mice. *The Laryngoscope* **115**: 1996–1999.
- 13 Kraus, W. E., M. Bhapkar, K. M. Huffman, C. F.  
14 Pieper, S. Krupa Das, *et al.*, 2019 2 years of  
15 calorie restriction and cardiometabolic risk (CA-  
16 LERIE): exploratory outcomes of a multicentre,  
17 phase 2, randomised controlled trial. *The Lancet*  
18 *Diabetes and Endocrinology* **7**: 673–683.
- 19 Lettice, L. A., L. A. Purdie, G. J. Carlson, F. Ki-  
20 lanowski, J. Dorin, *et al.*, 1999 The mouse bag-  
21 pipe gene controls development of axial skele-  
22 ton, skull, and spleen. *Proceedings of the Na-*  
23 *tional Academy of Sciences of the United States*  
24 *of America* **96**: 9695–9700.
- 25 Liang, Y., C. Liu, M. Lu, Q. Dong, Z. Wang, *et al.*,  
26 2018 Calorie restriction is the most reasonable  
27 anti-ageing intervention: A meta-analysis of sur-  
28 vival curves. *Scientific Reports* **8**: 1–9.
- 29 Liao, C. Y., B. A. Rikke, T. E. Johnson, V. Diaz,  
30 and J. F. Nelson, 2010 Genetic variation in the  
31 murine lifespan response to dietary restriction:  
32 From life extension to life shortening. *Aging Cell*  
33 **9**: 92–95.
- 34 Lincoln, S. E. and E. S. Lander, 1992 Systematic  
35 detection of errors in genetic linkage data. *Ge-*  
36 *nomics* **14**: 604–610.
- 37 Lindsey, M. L., Z. Kassiri, J. A. Virag, L. E. De Cas-  
38 tro Brás, and M. Scherrer-Crosbie, 2018 Guide-  
39 lines for measuring cardiac physiology in mice  
40 **314**: H733–H752.
- 41 Mandillo, S., V. Tucci, S. M. Höltner, H. Meziane,  
42 M. Al Banachaabouchi, *et al.*, 2008 Reliability,  
43 robustness, and reproducibility in mouse be-  
44 havioral phenotyping: A cross-laboratory study.  
45 *Physiological Genomics* **34**: 243–255.
- 46 Mattison, J. A., R. J. Colman, T. M. Beasley, D. B.  
47 Allison, J. W. Kemnitz, *et al.*, 2017 Caloric re-  
48 striction improves health and survival of rhesus  
49 monkeys. *Nature Communications* **8**: 1–12.
- 50 Maurissen, J. P., B. R. Marable, A. K. Andrus,  
51 and K. E. Stebbins, 2003 Factors affecting grip  
52 strength testing. *Neurotoxicology and Teratology*  
53 **25**: 543–553.
- 54 Medrano, G., J. Hermosillo-Rodriguez, T. Pham,  
55 A. Granillo, C. J. Hartley, *et al.*, 2016 Left atrial  
56 volume and pulmonary artery diameter are non-  
57 invasive measures of age-related diastolic dys-  
function in mice. *Journals of Gerontology - Se-*  
Series A Biological Sciences and Medical Sciences  
**71**: 1141–1150.
- Mitchell, S. J., J. Madrigal-Matute, M. Scheibye-  
Knudsen, E. Fang, M. Aon, *et al.*, 2016 Effects of  
Sex, Strain, and Energy Intake on Hallmarks of  
Aging in Mice. *Cell Metabolism* **23**: 1093–1112.
- Morgan, A. P., C. P. Fu, C. Y. Kao, C. E. Welsh, J. P.  
Didion, *et al.*, 2016 The mouse universal geno-  
typing array: From substrains to subspecies.  
G3: Genes, Genomes, Genetics **6**: 263–279.
- Mulligan, J. D., A. M. Stewart, and K. W. Saupe,  
2008 Downregulation of plasma insulin levels  
and hepatic PPAR $\gamma$  expression during the first  
week of caloric restriction in mice. *Experimen-*  
*tal Gerontology* **43**: 146–153.
- Oshima, Y., N. Ouchi, K. Sato, Y. Izumiya, D. R.  
Pimentel, *et al.*, 2008 Follistatin-like 1 is an Akt-  
regulated cardioprotective factor that is secreted  
by the heart. *Circulation* **117**: 3099–3108.
- Patel, N. V., M. N. Gordon, K. E. Connor, R. A.  
Good, R. W. Engelman, *et al.*, 2005 Caloric re-  
striction attenuates A $\beta$ -deposition in Alzheimer  
transgenic models. *Neurobiology of Aging* **26**:  
995–1000.
- Pifferi, F., J. Terrien, M. Perret, J. Epelbaum,  
S. Blanc, *et al.*, 2019 Promoting healthspan and  
lifespan with caloric restriction in primates **2**:  
1–3.
- Redman, L. M., S. R. Smith, J. H. Burton, C. K.  
Martin, D. Il'yasova, *et al.*, 2018 Metabolic Slow-  
ing and Reduced Oxidative Damage with Sus-  
tained Caloric Restriction Support the Rate of  
Living and Oxidative Damage Theories of Aging.  
*Cell Metabolism* **27**: 805–815.e4.
- Sajan, S. A., J. Ganesh, D. N. Shinde, Z. Powis,  
M. I. Scarano, *et al.*, 2019 Biallelic disruption  
of PKDCC is associated with a skeletal disorder  
characterised by rhizomelic shortening of ex-  
tremities and dysmorphic features. *Journal of*  
*Medical Genetics* **56**: 850–854.
- Schweizer, H., R. L. Johnson, and B. Brand-  
Saber, 2004 Characterization of migration be-  
havior of myogenic precursor cells in the limb  
bud with respect to Lmx1b expression. *Anatomy*  
*and Embryology* **208**: 7–18.
- Shimano, M., N. Ouchi, K. Nakamura, B. Van  
Wijk, K. Ohashi, *et al.*, 2011 Cardiac myocyte  
follistatin-like 1 functions to attenuate hypertro-  
phy following pressure overload. *Proceedings of*  
*the National Academy of Sciences of the United*  
*States of America* **108**: E899–E906.
- Someya, S., T. Yamasoba, R. Weindruch, T. A.  
Prolla, and M. Tanokura, 2007 Caloric restric-  
tion suppresses apoptotic cell death in the mam-  
malian cochlea and leads to prevention of pres-  
bycusis. *Neurobiology of Aging* **28**: 1613–1622.

1 Someya, S., W. Yu, W. C. Hallows, J. Xu, J. M.  
 2 Vann, *et al.*, 2010 Sirt3 mediates reduction of  
 3 oxidative damage and prevention of age-related  
 4 hearing loss under Caloric Restriction. *Cell* **143**:  
 5 802–812.  
 6 Stan Development Team, 2020 RStan: the R inter-  
 7 face to Stan. R package version 2.21.2.  
 8 Svenson, K. L., D. M. Gatti, W. Valdar, C. E. Welsh,  
 9 R. Cheng, *et al.*, 2012 High-Resolution Genetic  
 10 Mapping Using the Mouse **190**: 437–447.  
 11 Tereshchenko, L. G., N. Sotoodehnia, C. M. Sitlani,  
 12 F. N. Ashar, M. Kabir, *et al.*, ????. Journal of the  
 13 American Heart Association p. e008160.  
 14 Tukey, J. W., 1977 *Exploratory data analysis*.  
 15 Reading, Mass. : Addison-Wesley Pub. Co., 17th  
 16 edition.  
 17 Villareal, D. T., L. Fontana, S. K. Das, L. Red-  
 18 man, S. R. Smith, *et al.*, 2016 Effect of Two-  
 19 Year Caloric Restriction on Bone Metabolism and  
 20 Bone Mineral Density in Non-Obese Younger  
 21 Adults: A Randomized Clinical Trial. *Journal of*  
 22 *Bone and Mineral Research* **31**: 40–51.  
 23 Villareal, D. T., L. Fontana, E. P. Weiss, S. B.  
 24 Racette, K. Steger-May, *et al.*, 2006 Bone mineral  
 25 density response to caloric restriction-induced  
 26 weight loss or exercise-induced weight loss: A  
 27 randomized controlled trial. *Archives of Internal*  
 28 *Medicine* **166**: 2502–2510.  
 29 Weindruch, R., S. R. Gottesman, and R. L. Wal-  
 30 ford, 1982 Modification of age-related immune  
 31 decline in mice dietarily restricted from or af-  
 32 ter midadulthood. *Proceedings of the National*  
 33 *Academy of Sciences of the United States of*  
 34 *America* **79**: 898–902.  
 35 Weiss, E. P., S. B. Racette, D. T. Villareal,  
 36 L. Fontana, K. Steger-May, *et al.*, 2007 Lower  
 37 extremity muscle size and strength and aerobic  
 38 capacity decrease with caloric restriction but  
 39 not with exercise-induced weight loss. *Journal*  
 40 *of Applied Physiology* **102**: 634–640.  
 41 Westfall, P. H., S. S. Young, and S. P. Wright, 1993  
 42 On Adjusting P-Values for Multiplicity. *Biomet-*  
 43 *rics* **49**: 941.  
 44 Wright, K. M., A. Deighan, A. D. Francesco, A. Fre-  
 45 und, V. Jojic, *et al.*, 2020 Age and diet shape the  
 46 genetic architecture of body weight in diversity  
 47 outbred mice. *bioRxiv* **2020**: 11.04.364398.  
 48 Yu, B. P., E. J. Masoro, and C. A. McMahan, 1985  
 49 Nutritional influences on aging of Fischer 344  
 50 rats: I. Physical, metabolic, and longevity char-  
 51 acteristics. *Journals of Gerontology* **40**: 657–  
 52 670.

where  $\epsilon$  follows multivariate normal distribution  
 with mean 0 and covariance matrix  $\sigma^2(2h^2K + (1 -$   
 $h^2)I)$  where  $\sigma^2$  is the total phenotypic variance,  $h^2$   
 is heritability,  $K$  is the kinship matrix and  $I$  is  
 identity matrix. The prior information is as fol-  
 lows:

$$\sigma^2 \sim \text{InverseGamma}(1, 0.5)$$

$$h^2 \sim \text{Uniform}(0, 1)$$

$$\beta \sim \text{MultivariateNormal}(M, \Sigma)$$

where  $M = [0, 0, 0, 0, 0]$  and  $\Sigma = 2I_{5 \times 5}$ .

**Genetic correlation analysis model details.** Consid-  
 ering two traits  $Y_1$  and  $Y_2$ , we estimated genetic  
 correlation by fitting the Bayesian model:  $\begin{bmatrix} Y_1 \\ Y_2 \end{bmatrix} =$

$\begin{bmatrix} X\beta_1 \\ X\beta_2 \end{bmatrix} + \epsilon$ , where  $\epsilon$  follows multivariate normal  
 distribution with mean 0 and covariance matrix  
 $\begin{bmatrix} 2\sigma_{g1}^2K + \sigma_{e1}^2I & 2\gamma\sigma_{g1}\sigma_{g2}K + \lambda\sigma_{g1}\sigma_{g2}I \\ 2\gamma\sigma_{g1}\sigma_{g2}K + \lambda\sigma_{g1}\sigma_{g2}I & 2\sigma_{g2}^2K + \sigma_{e2}^2I \end{bmatrix}$  where  $K$  is  
 the kinship matrix;  $I$  is the identity matrix;  $\sigma_{g1}^2$   
 and  $\sigma_{e1}^2$  are genetic and environmental variance for  
 trait  $Y_1$  respectively;  $\sigma_{g2}^2$  and  $\sigma_{e2}^2$  are genetic and  
 environmental variance for trait  $Y_2$  respectively;  $\gamma$   
 is genetic correlation and  $\lambda$  represents the correla-  
 tion due to an individual's environment. The prior  
 information is as follows:

$$\gamma, \lambda \sim \text{Uniform}(-1, 1)$$

$$\beta_1, \beta_2 \sim \text{MultivariateNormal}(M, \Sigma)$$

where  $M = [0, 0, 0, 0, 0]$  and  $\Sigma = 2I_{5 \times 5}$ .  $\sigma_{g1}^2$ ,  $\sigma_{g2}^2$ ,  $\sigma_{e1}^2$   
 and  $\sigma_{e2}^2$  are estimated by fitting each trait individ-  
 ually with diet as fix effect and kinship as random  
 effect using maximum likelihood method.

## Supplemental Tables and Figures.

## Supplemental Material

**Heritability analysis model details.** We estimated her-  
 itability by fitting the Bayesian model  $Y = X\beta + \epsilon$

| Phenotyping Procedure            | Trait    | AL  | 1D  | 2D  | 20  | 40  | Total |
|----------------------------------|----------|-----|-----|-----|-----|-----|-------|
| Rotarod (RR)                     | RR_FIRS  | 153 | 176 | 184 | 154 | 163 | 830   |
|                                  | RR_SLOP  | 153 | 176 | 184 | 154 | 163 | 830   |
|                                  | RR_TAVG  | 153 | 176 | 184 | 154 | 163 | 830   |
| Grip strength (GS)               | GS_APAW  | 185 | 176 | 184 | 184 | 178 | 907   |
|                                  | GS_FORE  | 182 | 176 | 184 | 183 | 178 | 903   |
| Echocardiogram (EC)              | EC_COUT  | 180 | 172 | 180 | 182 | 171 | 885   |
|                                  | EC_EFRA  | 180 | 172 | 180 | 182 | 171 | 885   |
|                                  | EC_HRAT  | 180 | 172 | 180 | 182 | 171 | 885   |
|                                  | EC_IVSD  | 180 | 172 | 180 | 182 | 169 | 883   |
|                                  | EC_IVSS  | 180 | 172 | 180 | 182 | 171 | 885   |
|                                  | EC_LVID  | 180 | 172 | 180 | 182 | 171 | 885   |
|                                  | EC_LVIS  | 180 | 172 | 180 | 182 | 171 | 885   |
|                                  | EC_LVMA  | 180 | 172 | 179 | 182 | 169 | 882   |
|                                  | EC_LVPD  | 180 | 172 | 179 | 182 | 170 | 883   |
|                                  | EC_LVPS  | 180 | 172 | 180 | 181 | 171 | 884   |
| Dual-energy X-ray absorptiometry | EC_STRO  | 180 | 172 | 180 | 181 | 171 | 884   |
|                                  | DX_BARE  | 185 | 171 | 177 | 184 | 176 | 893   |
|                                  | DX_BODY  | 185 | 171 | 177 | 184 | 176 | 893   |
|                                  | DX_BOMC  | 185 | 171 | 177 | 184 | 176 | 893   |
|                                  | DX_BOMD  | 184 | 171 | 177 | 184 | 176 | 892   |
|                                  | DX_PFAT  | 185 | 171 | 177 | 184 | 176 | 893   |
|                                  | DX_SIZE  | 185 | 171 | 176 | 184 | 175 | 891   |
|                                  | DX_TARE  | 185 | 171 | 177 | 184 | 176 | 893   |
| Y-maze spontaneous alternation   | DX_TTIME | 185 | 171 | 177 | 184 | 176 | 893   |
|                                  | YM_DIST  | 174 | 149 | 154 | 172 | 167 | 816   |
|                                  | YM_ENTR  | 174 | 149 | 154 | 172 | 165 | 814   |
|                                  | YM_EPIS  | 175 | 149 | 154 | 172 | 167 | 817   |
|                                  | YM_MAXS  | 174 | 149 | 153 | 170 | 166 | 812   |
|                                  | YM_PALT  | 175 | 147 | 154 | 172 | 166 | 814   |
| Acoustic startle (AS)            | YM_TIME  | 175 | 149 | 154 | 172 | 167 | 817   |
|                                  | AS_SLOP  | 127 | 138 | 136 | 129 | 122 | 652   |
|                                  | AS_TAUC  | 138 | 143 | 148 | 135 | 142 | 706   |
|                                  | AS_XINF  | 132 | 141 | 141 | 134 | 131 | 679   |
| Wheel running (WR)               | AS_YINF  | 133 | 141 | 140 | 134 | 131 | 679   |
|                                  | WR_DDAY  | 178 | 170 | 173 | 178 | 167 | 866   |
|                                  | WR_DIST  | 182 | 173 | 176 | 183 | 174 | 888   |
|                                  | WR_DNIG  | 182 | 173 | 176 | 183 | 177 | 891   |
|                                  | WR_MDAY  | 181 | 172 | 177 | 179 | 175 | 884   |
|                                  | WR_MNIG  | 182 | 173 | 178 | 183 | 178 | 894   |
|                                  | WR_MSPE  | 181 | 171 | 178 | 182 | 176 | 888   |
| WR_TDAY                          | 181      | 172 | 177 | 182 | 172 | 884 |       |
| WR_TNIG                          | 182      | 174 | 178 | 183 | 178 | 895 |       |

Table S1. Total number of samples per trait and per diet after outlier removal.

| Cluster size | Threshold |
|--------------|-----------|
| 2            | 0.55      |
| 3            | 0.59      |
| 4            | 0.64      |
| 5            | 0.66      |
| 6            | 0.68      |
| 7            | 0.71      |
| 8            | 0.71      |
| 9            | 0.75      |
| 10           | 0.73      |
| 11           | 0.75      |
| 12           | 0.75      |
| 13           | 0.76      |
| 14           | 0.77      |
| 15           | 0.79      |

**Table S2. Significance threshold for unsupervised hierarchical clustering analysis.**

| Cluster           | Trait (s)                                  | Description                          | PC Trait Abbreviation |
|-------------------|--------------------------------------------|--------------------------------------|-----------------------|
| 1                 | EC_LVPD, EC_LVPS                           | ECHO 1.- LV posterior wall thickness | PC_ECL                |
| 2                 | EC_IVSD, EC_IVSS                           | ECHO 2.- IV septum thickness         | PC_ECI                |
| 3                 | EC_EFRA, EC_LVIS                           | ECHO 3.- ejection fraction           | PC_ECE                |
| 4                 | RR_FIRS, RR_SLOP, RR_TAVG                  | rotarod                              | PC_ROR                |
| 5                 | DX_BARE, DX_BOMC, DX_BOMD                  | DEXA i.- bone composition            | PC_DXB                |
| 6                 | AS_TAUC, AS_YINF                           | Hearing                              | PC_DXB                |
| 7                 | EC_COUT, EC_LVID, EC_LVMA, EC_STRO         | ECHO 4.- heart output                | PC_ECC                |
| 8                 | WR_DDAY, WR_MDAY, WR_TDAY                  | Wheel Run 1.-day                     | PC_WRD                |
| 9                 | DX_BODY, DX_PFAT, DX_TARE, DX_TTME         | DEXA ii.- body composition           | PC_DXS                |
| 10                | WR_DIST, WR_DNIG, WR_MNIG, WR_MSPE, WR_TNI | Wheel Run 2. - night                 | PC_WRN                |
| <b>Singletons</b> |                                            |                                      |                       |
| 1                 | EC_HRAT                                    | ECHO - heart rate                    |                       |
| 2                 | AS_XINF                                    | Hearing - model fit, x intercept     |                       |
| 3                 | GS_APAW                                    | Grip Strength - All Paw              |                       |
| 4                 | GS_FORE                                    | Grip Strength - Fore Paw             |                       |
| 5                 | AS_SLOP                                    | Hearing - model fit, slope           |                       |
| 6                 | DX_SIZE                                    | DEXA - body length                   |                       |

**Table S3. For trait groups identified in hierarchical clustering analysis, we list the directly measured and the principal component derived traits.**

|                                  | Diet  | Model                                                                                                                                                                                                                                                   | LOD_model_I<br>-<br>LOD_model_II |
|----------------------------------|-------|---------------------------------------------------------------------------------------------------------------------------------------------------------------------------------------------------------------------------------------------------------|----------------------------------|
| PC_ECE2<br>Chr16:<br>UNC26651633 | 1D    | Model I: $Y = \text{Diet} + G + \text{Diet1D} * G + \text{Diet20} * G + \text{Diet2D} * G + \text{Diet40} * G + \text{Kinship} + E$<br>Model II: $Y = \text{Diet} + G + \text{Diet2D} * G + \text{Diet20} * G + \text{Diet40} * G + \text{Kinship} + E$ | 3.4                              |
|                                  | 20    | Model II: $Y = \text{Diet} + G + \text{Diet1D} * G + \text{Diet2D} * G + \text{Diet40} * G + \text{Kinship} + E$                                                                                                                                        | 7.2                              |
|                                  | 2D    | Model II: $Y = \text{Diet} + G + \text{Diet1D} * G + \text{Diet20} * G + \text{Diet40} * G + \text{Kinship} + E$                                                                                                                                        | 7.7                              |
|                                  | 40    | Model II: $Y = \text{Diet} + G + \text{Diet1D} * G + \text{Diet20} * G + \text{Diet2D} * G + \text{Kinship} + E$                                                                                                                                        | 1.8                              |
|                                  | 1D/20 | Model II: $Y = \text{Diet} + G + \text{Diet2D} * G + \text{Diet40} * G + \text{Kinship} + E$                                                                                                                                                            | 8.1                              |
|                                  | 20/2D | Model II: $Y = \text{Diet} + G + \text{Diet1D} * G + \text{Diet40} * G + \text{Kinship} + E$                                                                                                                                                            | 11.6                             |
|                                  | 20/40 | Model II: $Y = \text{Diet} + G + \text{Diet1D} * G + \text{Diet2D} * G + \text{Kinship} + E$                                                                                                                                                            | 8.9                              |
| AS_YINF<br>Chr9:<br>UNC16962149  | 1D    | Model I: $Y = \text{Diet} + G + \text{Diet1D} * G + \text{Diet20} * G + \text{Diet2D} * G + \text{Diet40} * G + \text{Kinship} + E$<br>Model II: $Y = \text{Diet} + G + \text{Diet2D} * G + \text{Diet20} * G + \text{Diet40} * G + \text{Kinship} + E$ | 3.6                              |
|                                  | 20    | Model II: $Y = \text{Diet} + G + \text{Diet1D} * G + \text{Diet2D} * G + \text{Diet40} * G + \text{Kinship} + E$                                                                                                                                        | 0.7                              |
|                                  | 2D    | Model II: $Y = \text{Diet} + G + \text{Diet1D} * G + \text{Diet20} * G + \text{Diet40} * G + \text{Kinship} + E$                                                                                                                                        | 3.9                              |
|                                  | 40    | Model II: $Y = \text{Diet} + G + \text{Diet1D} * G + \text{Diet20} * G + \text{Diet2D} * G + \text{Kinship} + E$                                                                                                                                        | 4.8                              |
|                                  | 1D/40 | Model II: $Y = \text{Diet} + G + \text{Diet20} * G + \text{Diet2D} * G + \text{Kinship} + E$                                                                                                                                                            | 8.9                              |
|                                  | 20/40 | Model II: $Y = \text{Diet} + G + \text{Diet1D} * G + \text{Diet2D} * G + \text{Kinship} + E$                                                                                                                                                            | 7.3                              |
|                                  | 2D/40 | Model II: $Y = \text{Diet} + G + \text{Diet1D} * G + \text{Diet20} * G + \text{Kinship} + E$                                                                                                                                                            | 7.2                              |
| PC_ECL1*<br>Chr2:<br>JAX00486864 | 1D    | Model I: $Y = \text{Diet} + G + \text{Diet1D} * G + \text{Diet20} * G + \text{Diet2D} * G + \text{Diet40} * G + \text{Kinship} + E$<br>Model II: $Y = \text{Diet} + G + \text{Diet2D} * G + \text{Diet20} * G + \text{Diet40} * G + \text{Kinship} + E$ | 6.2                              |
|                                  | 20    | Model II: $Y = \text{Diet} + G + \text{Diet1D} * G + \text{Diet2D} * G + \text{Diet40} * G + \text{Kinship} + E$                                                                                                                                        | 5.6                              |
|                                  | 2D    | Model II: $Y = \text{Diet} + G + \text{Diet1D} * G + \text{Diet20} * G + \text{Diet40} * G + \text{Kinship} + E$                                                                                                                                        | 1.8                              |
|                                  | 40    | Model II: $Y = \text{Diet} + G + \text{Diet1D} * G + \text{Diet20} * G + \text{Diet2D} * G + \text{Kinship} + E$                                                                                                                                        | 1.8                              |
|                                  | 1D/20 | Model II: $Y = \text{Diet} + G + \text{Diet2D} * G + \text{Diet40} * G + \text{Kinship} + E$                                                                                                                                                            | 11.9                             |
|                                  | 1D/2D | Model II: $Y = \text{Diet} + G + \text{Diet20} * G + \text{Diet40} * G + \text{Kinship} + E$                                                                                                                                                            | 9.4                              |
|                                  | 1D/40 | Model II: $Y = \text{Diet} + G + \text{Diet20} * G + \text{Diet2D} * G + \text{Kinship} + E$                                                                                                                                                            | 8.0                              |

\*Note: EC\_LVPD (Chr2: UNCHS004526) has the same pattern as PC\_ECL1.

**Table S4. Reduced genotype x diet association model test. For each lead marker at a GxD interaction QTL, we compare the LOD scores of full (Model I) and reduced (Model II) genetic association models. Reduced models test the effect of four, non AL diets in isolation, and for the single diet with the maximum difference between Model I and Model II LOD score, the three possible two diet combinations are also tested.**

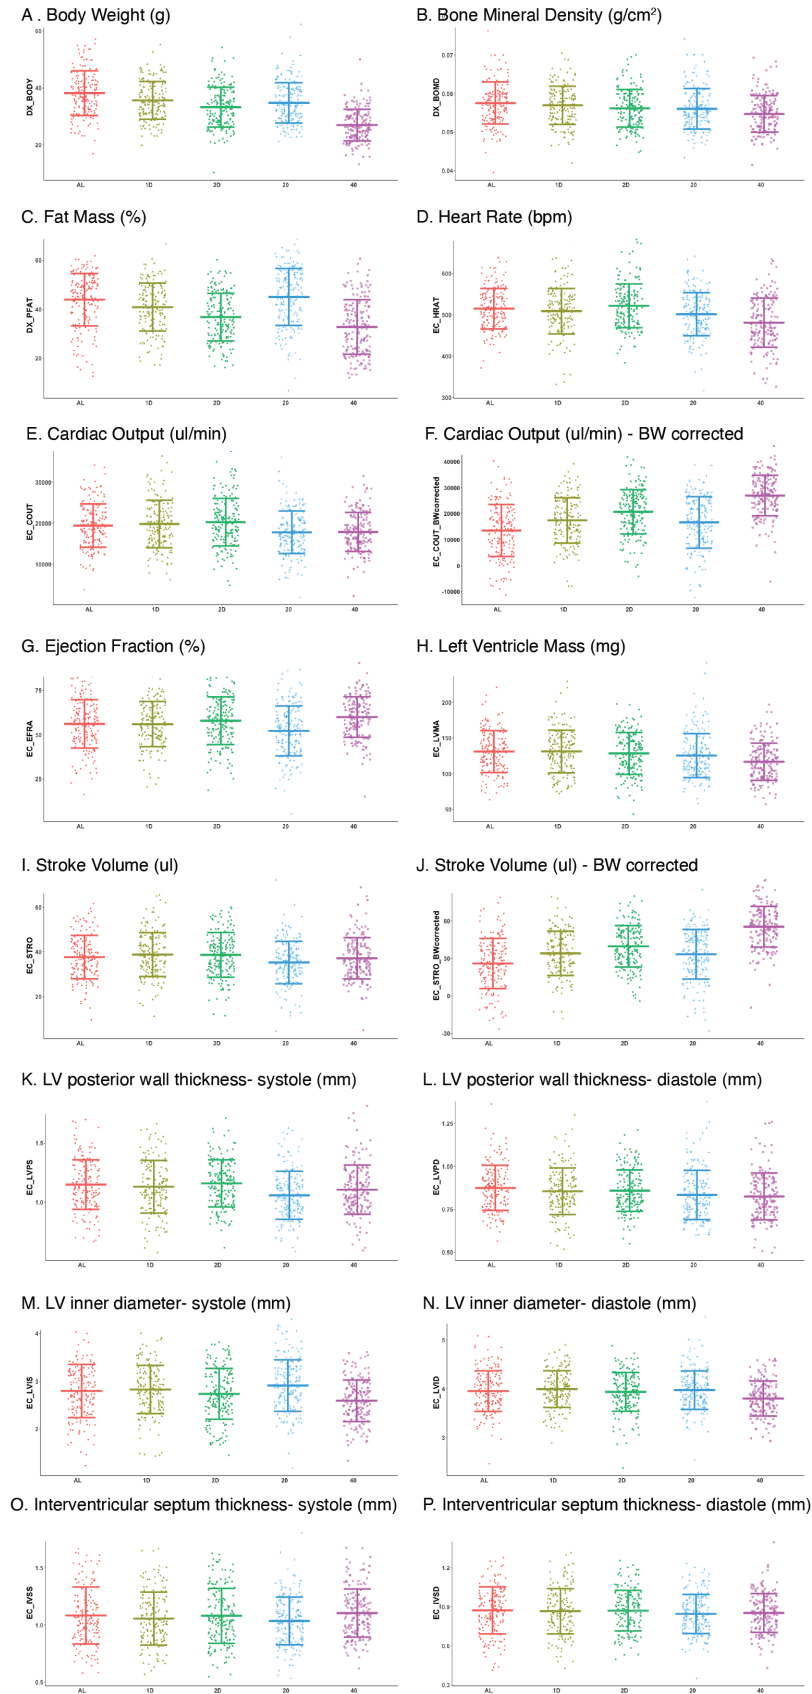

**Fig. S1. Sixteen DEXA and echocardiogram derived trait values for each diet. Horizontal bars display Mean  $\pm$  SD. For cardiac output (EC\_COUT) and stroke volume (EC\_STRO) we present the raw values and body weight corrected values (calculated following the same procedure as applied to grip strength and rotarod).**

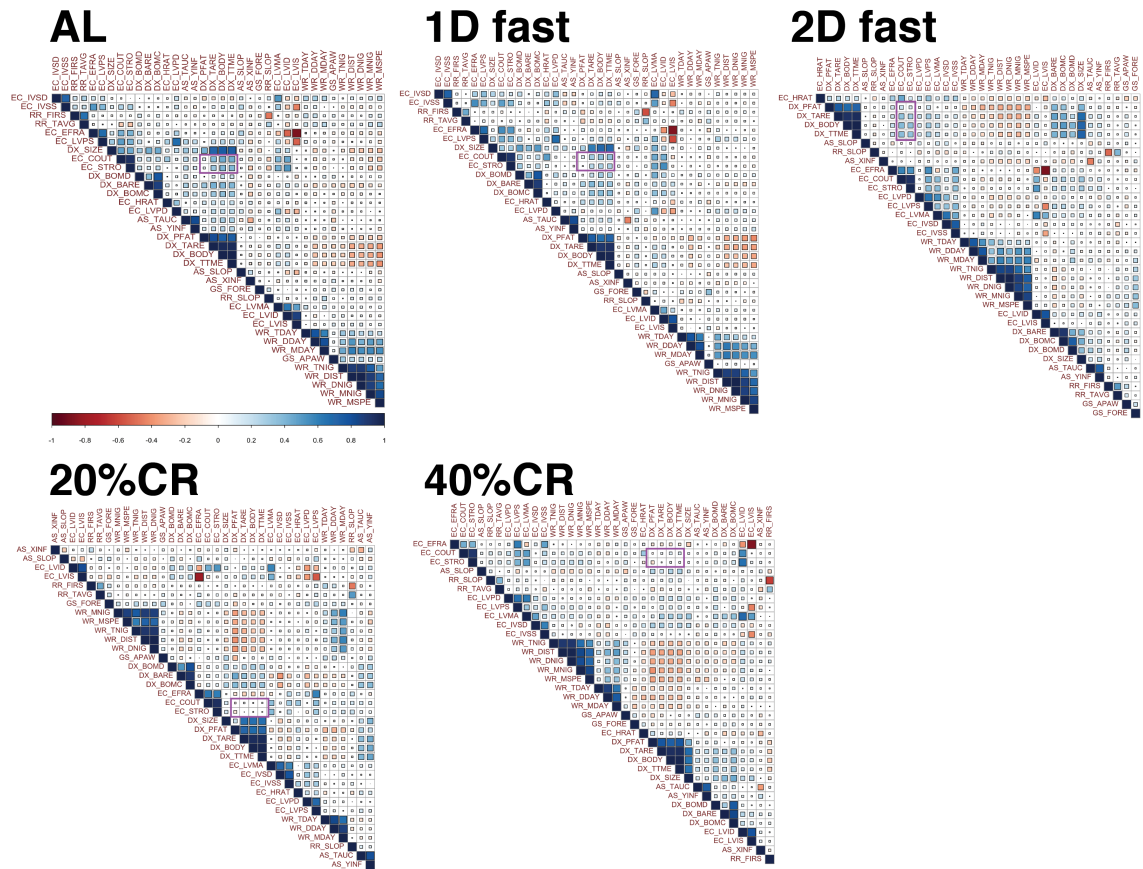

Fig. S2. Diet-specific pairwise phenotypic correlation values. Size and color of squares represent the positive (blue) or negative (red) correlation values. Purple box highlights pairwise correlations between cardiac output and stroke volume (EC\_COUT, EC\_STRO) and multiple body composition traits (DX\_PFAT, DX\_TARE, DX\_BODY, and DX\_TTME).

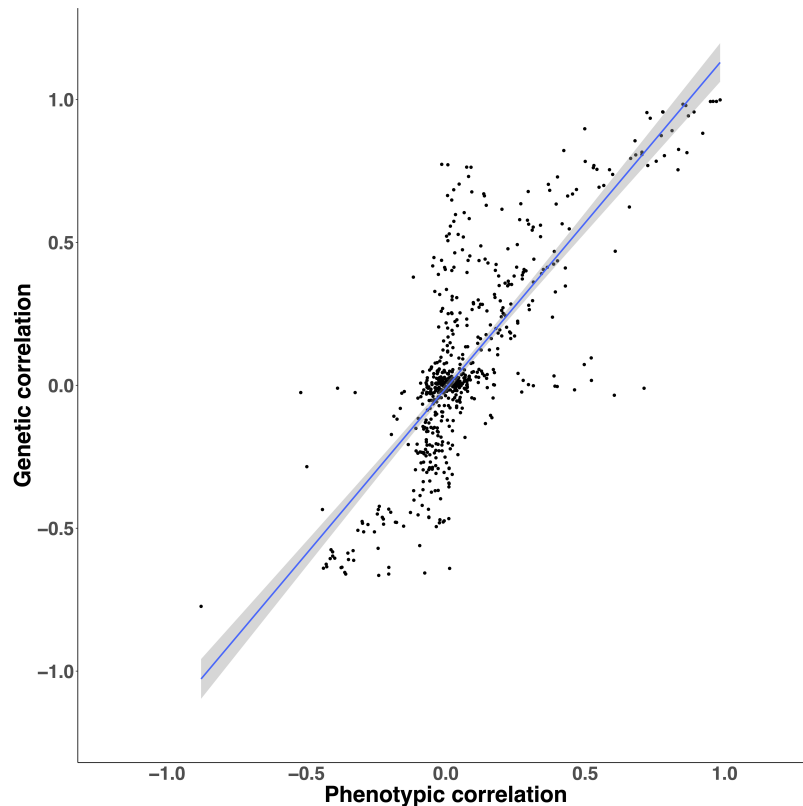

Fig. S3. Scatterplot of phenotypic versus genetic correlations. Grey line depicts linear correlation with 95% CI in shaded area.



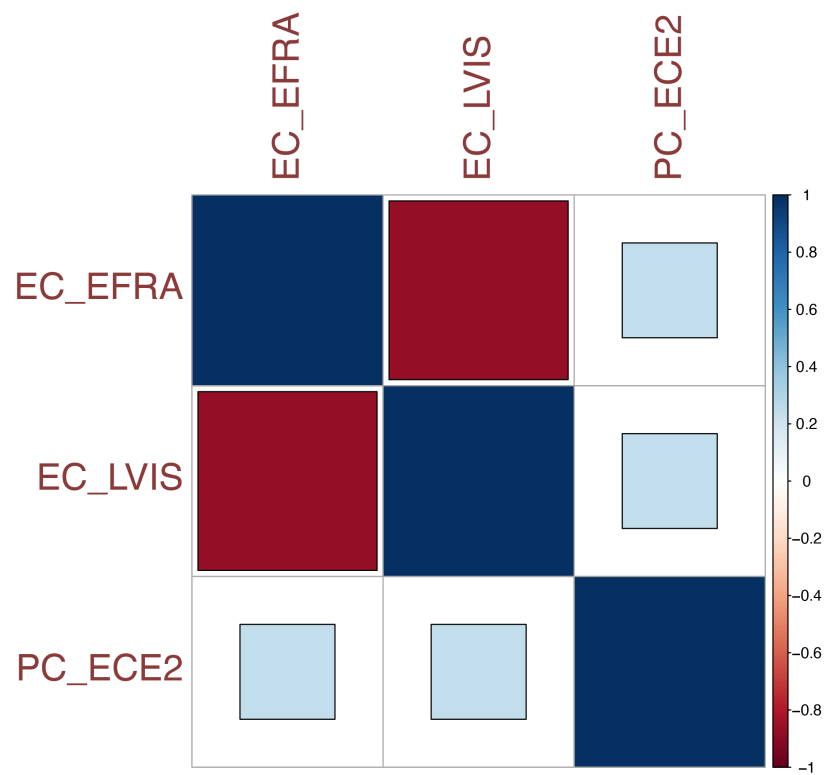

Fig. S4. Pairwise Pearson correlation values between PC\_ECE2 and the two directly measured traits used to calculate this principle component analysis trait: EC\_EFRA and EC\_LVIS.

## A. EC\_LVPS GxD Genetic Mapping

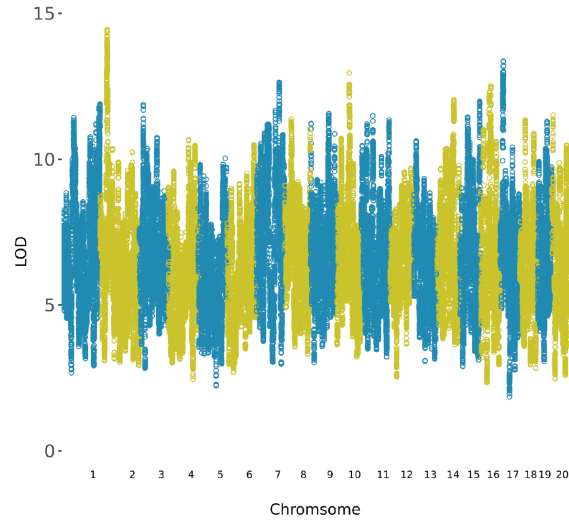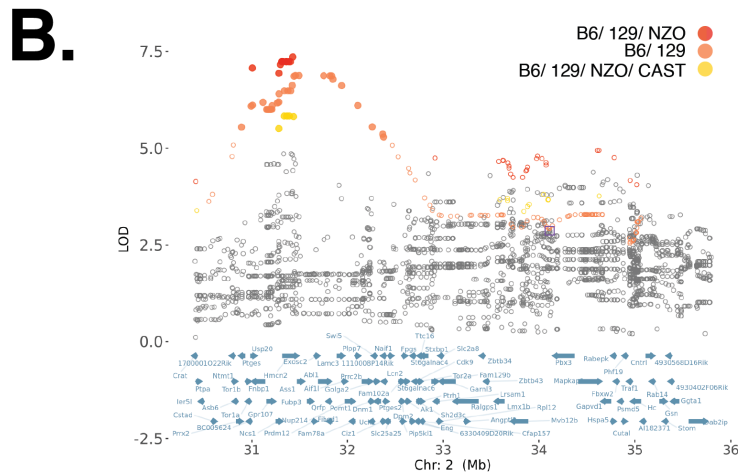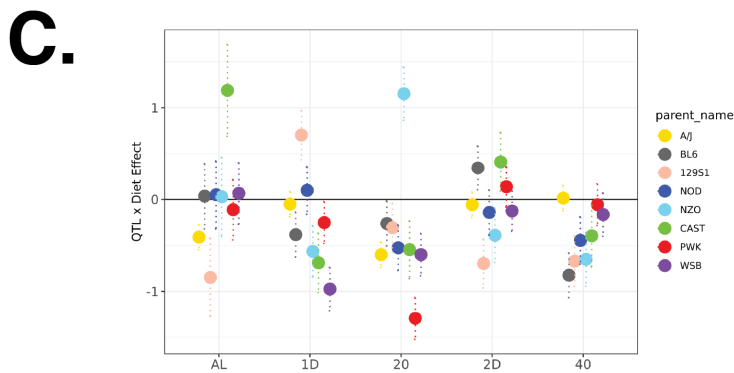

Fig. S5. A. Manhattan plot of diet-dependent genome-wide linkage mapping results for EC\_LVPS. B. Fine-mapping of chromosome 2 locus. Rank 1, 2, and 3 FAP variants shown in red, orange, and yellow circles. C. Diet-specific effect of lead genotyped variant for each of the eight founder variants.
